# Supplementary material for: Two new approaches based on dynamic carboxyl–hydroxyl or hydroxyl–carboxyl transformation for high molecular weight poly(butylene maleate)
Source: Royal Society of Chemistry journal article supplement (doi:10.1039/d0py00863j), 2020-01-01
Supplement: d0py00863j1.pdf [file d0py00863j1.pdf]

## Supporting Information

### **Two New approaches Based on Dynamic Carboxyl-Hydroxyl or Hydroxyl-Carboxyl Transformation for High Molecular Weight Poly(Butylene Maleate)**

Tong Chen, Sunan Tian, Zhining Xie, Zhao-Xia Guo, Jun Xu, Bao-Hua Guo\*

Key Laboratory of Advanced Materials (MOE), Department of Chemical Engineering, Tsinghua University,  
Beijing 100084, China

#### **Table of Contents**

|                                                                                                                                                  |    |
|--------------------------------------------------------------------------------------------------------------------------------------------------|----|
| Section S1. Results of model polyesterification using excess MA to BDO.....                                                                      | 2  |
| Section S2. NMR spectra of maleic anhydride byproduct .....                                                                                      | 3  |
| Section S3. Characterizations of MA-based polyesters prepared with excess MA .....                                                               | 4  |
| Section S4. PBM synthesis with conventional transesterification catalysts and dehydration of MA.....                                             | 11 |
| Section S5. Analysis of terminal groups by NMR during polyesterification with excess MA.....                                                     | 12 |
| Section S6. Characterization of poly(butylene itaconate) by NMR.....                                                                             | 13 |
| Section S7. NMR spectra of MA-based polyesters prepared with equimolar MA and diols.....                                                         | 14 |
| Section S8. NMR Spectra of MA-based polyesters prepared with excess diols.....                                                                   | 20 |
| Section S9. PBM synthesis with conventional transesterification catalysts with excess BDO and PBM synthesis using Dimethyl maleate and BDO ..... | 23 |
| Section S10. Analysis of byproduct in the cold trap by NMR.....                                                                                  | 24 |
| Section S11. Analysis of terminal groups by NMR during polyesterification with excess diol.....                                                  | 25 |
| Section S12. Characterizations of the cyclic byproducts obtained with excess BDO .....                                                           | 26 |

## Section S1. Results of model polyesterification using excess MA to BDO

Table S1 | Polyesterification of MA with BDO under different reaction conditions

| entry | MA/BDO <sup>a</sup> | TsOH (mol%) | temperature (°C) | time to climb (h) | M <sub>n</sub> (kDa) <sup>c</sup> | cis (%) <sup>d</sup> |
|-------|---------------------|-------------|------------------|-------------------|-----------------------------------|----------------------|
| 1     | 1.05 : 1            | 0.5         | 135              | N <sup>b</sup>    | 22                                | 95.2                 |
| 2     | 1.05 : 1            | 1           | 135              | 2.5               | 92                                | 93.9                 |
| 3     | 1.05 : 1            | 1.5         | 135              | 1.5               | 78                                | 96.2                 |
| 4     | 1.05 : 1            | 1           | 110              | 9                 | 38                                | 98.6                 |
| 5     | 1.05 : 1            | 1           | 120              | 3.5               | 72                                | 97.5                 |
| 6     | 1.05 : 1            | 1           | 150              | 1.5               | 59                                | 92.3                 |
| 7     | 1.1:1               | 1           | 135              | 4                 | 82                                | 94.1                 |

<sup>a</sup> MA/diol was the molar ratio of MA and diol. <sup>b</sup> No Weissenberg effect was observed within 8 h. <sup>c</sup> M<sub>n</sub> obtained by gel permeation chromatography (GPC) in CDCl<sub>3</sub>. <sup>d</sup> cis % was defined as cis/(cis+trans) and calculated from <sup>1</sup>H NMR.

## Section S2. NMR spectra of maleic anhydride byproduct

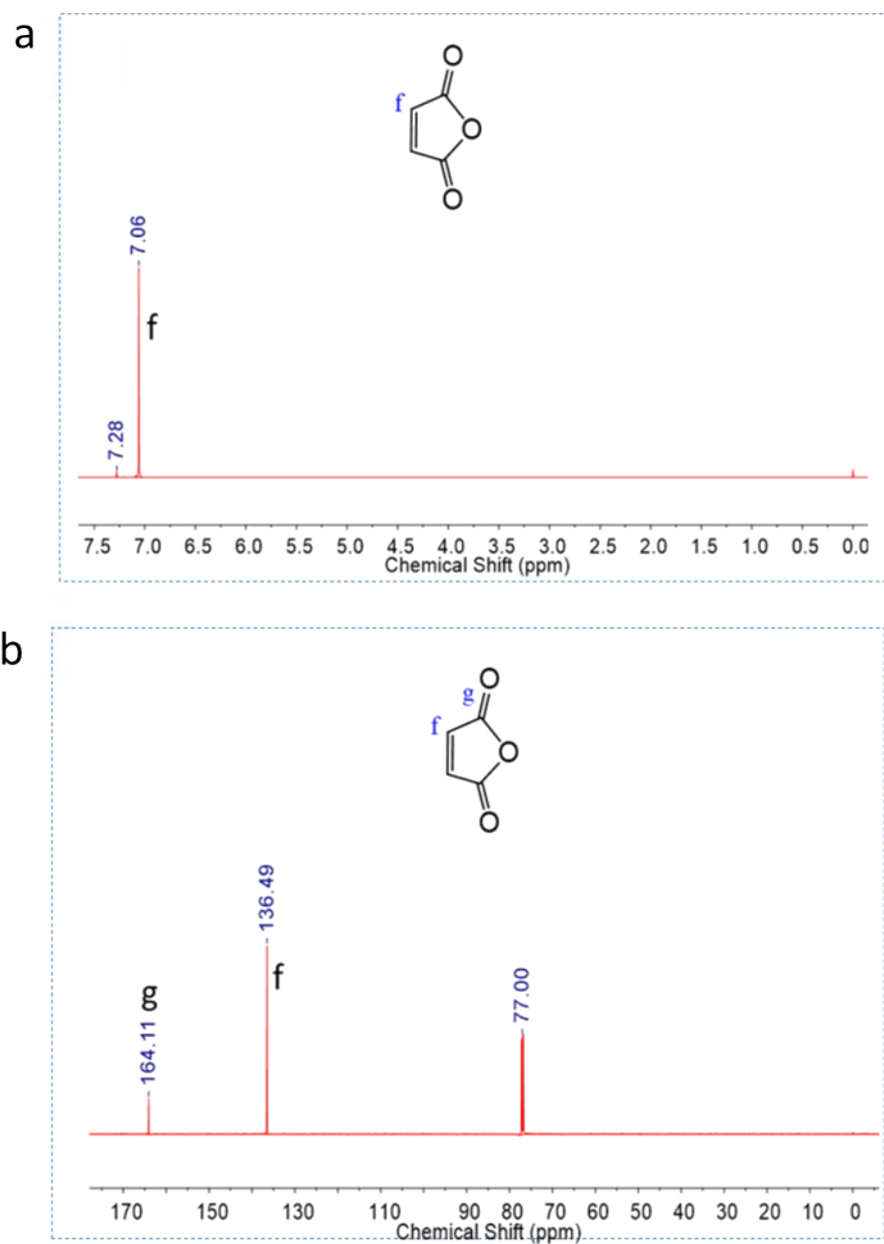

**Fig. S1** | a,  $^1\text{H}$  NMR spectrum of maleic anhydride. b,  $^{13}\text{C}$  NMR spectrum of maleic anhydride.

### Section S3. Characterizations of MA-based polyesters prepared with excess MA

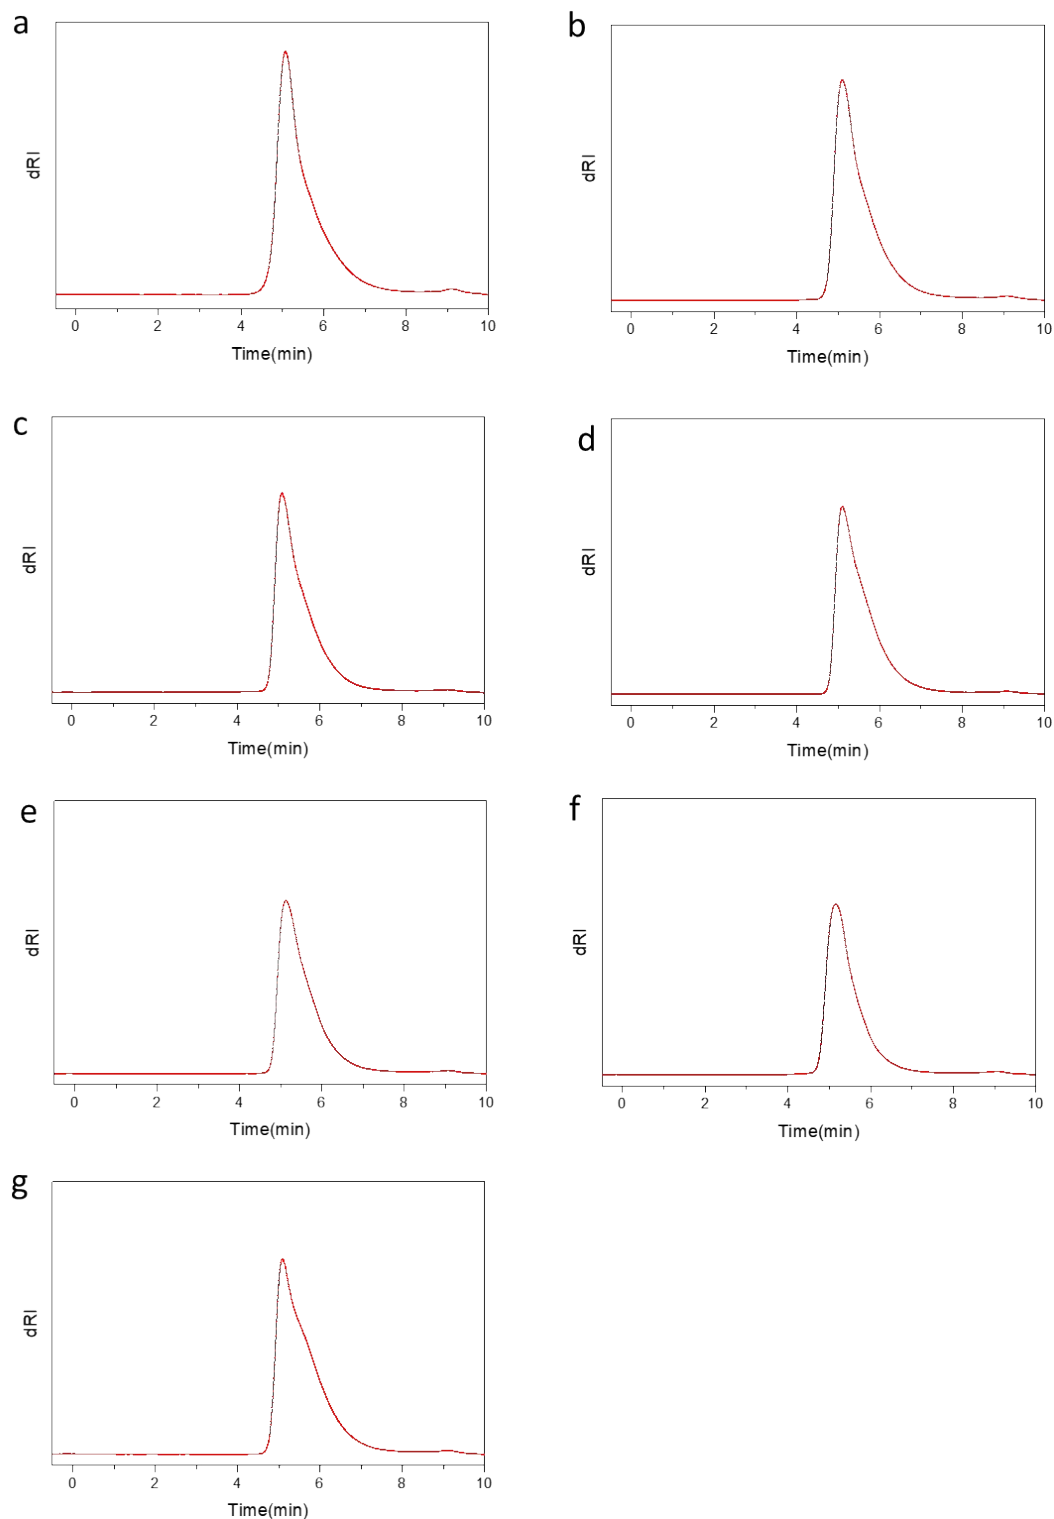

**Fig. S2 | GPC curves of MA-based polyesters synthesized with MA/diol of 1.05:1. a, PBM. b, Poly(pentylene maleate). c, Poly(3-methylpentylene maleate). d, Poly(hexylene maleate). e, Poly(decylene maleate). f, Poly(dodecylene maleate). g, Poly(1,4-cyclohexandimethylene maleate).**

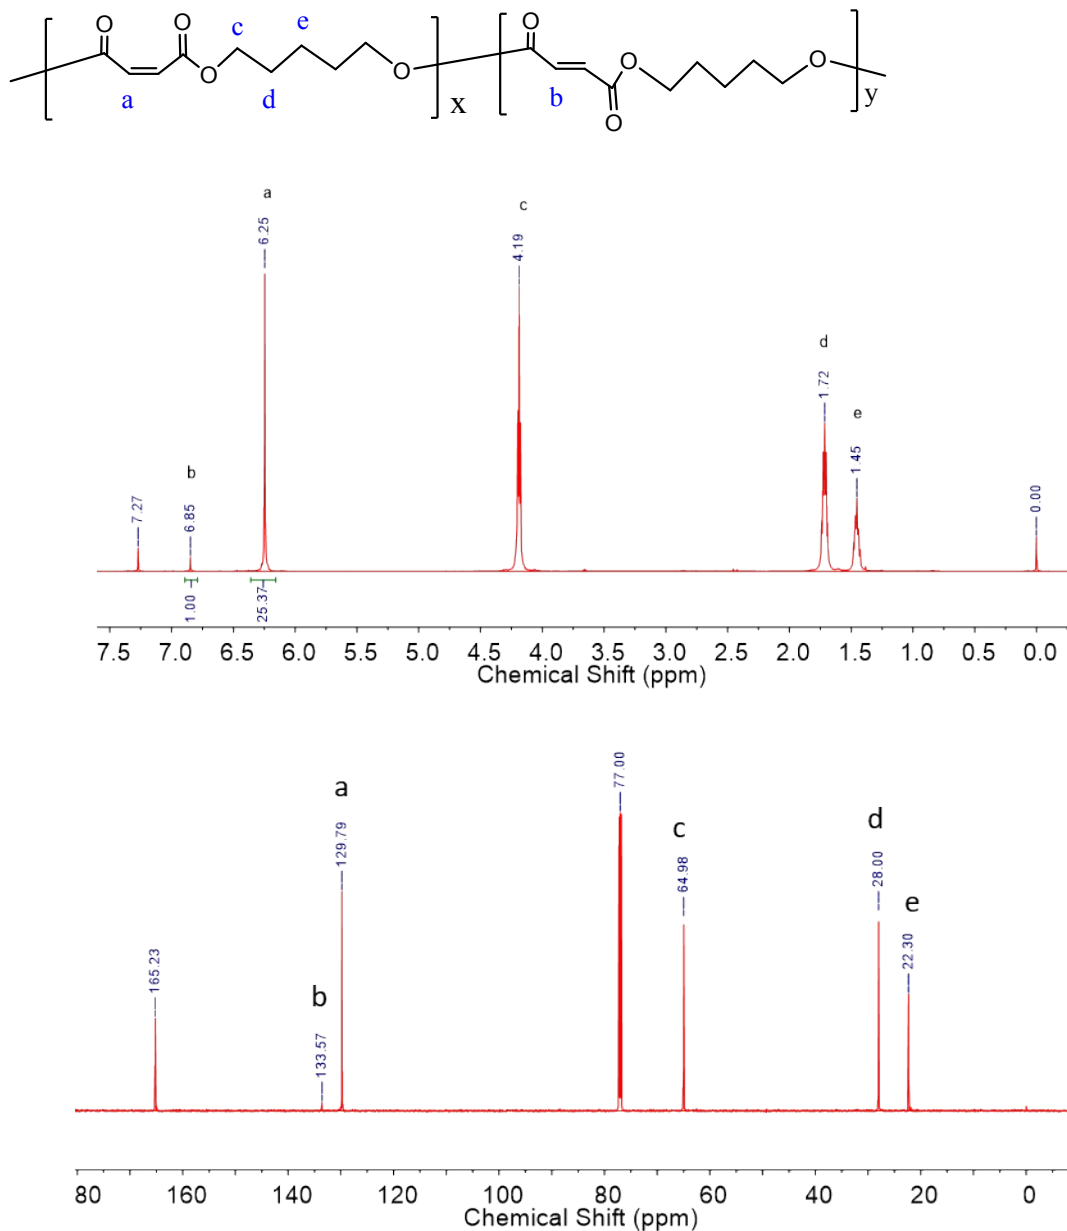

Figure S1 <sup>1</sup>H NMR of poly(pentene maleate)

**Fig. S3 | Poly(pentylene maleate) (Table 1, entry 2), synthesized with MA/1,5-pentanediol of 1.05:1, in CDCl<sub>3</sub>. Top: <sup>1</sup>H NMR spectrum. Bottom: <sup>13</sup>C NMR spectrum. (M<sub>n</sub>=77 kDa, cis content=96.2%)**

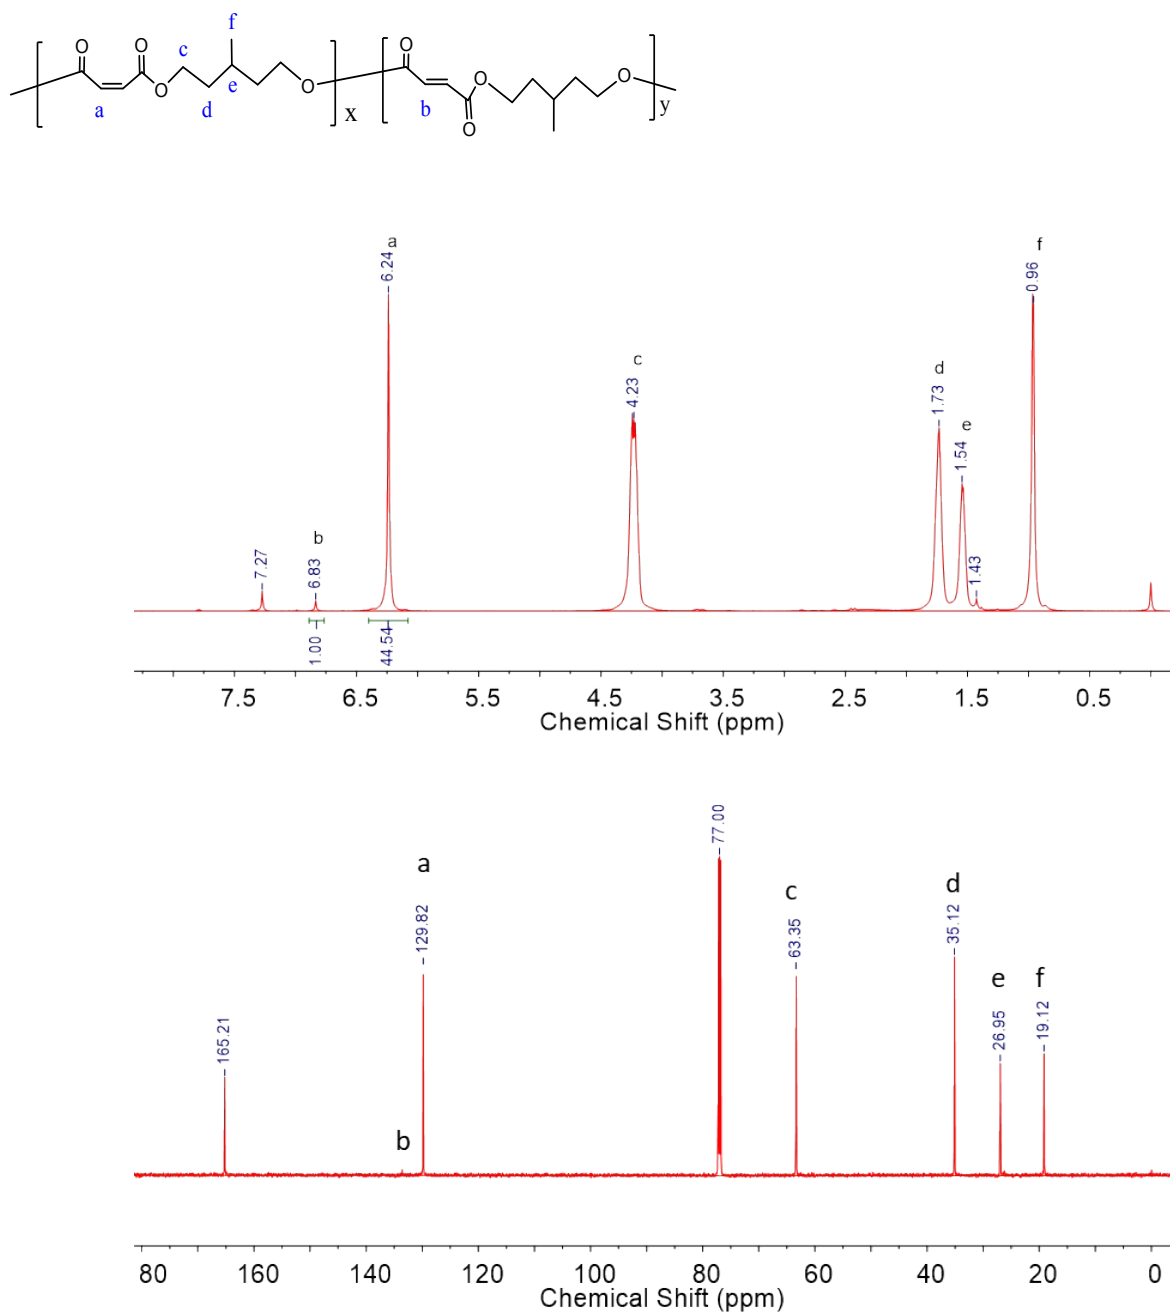

**Fig. S4 | Poly(3-methylpentylene maleate) (Table 1, entry 3), synthesized with MA/3-methyl-1,5-pentanediol of 1.05:1, in CDCl<sub>3</sub>. Top: <sup>1</sup>H NMR spectrum. Bottom: <sup>13</sup>C NMR spectrum. (M<sub>n</sub>=53 kDa, cis content=97.8%)**

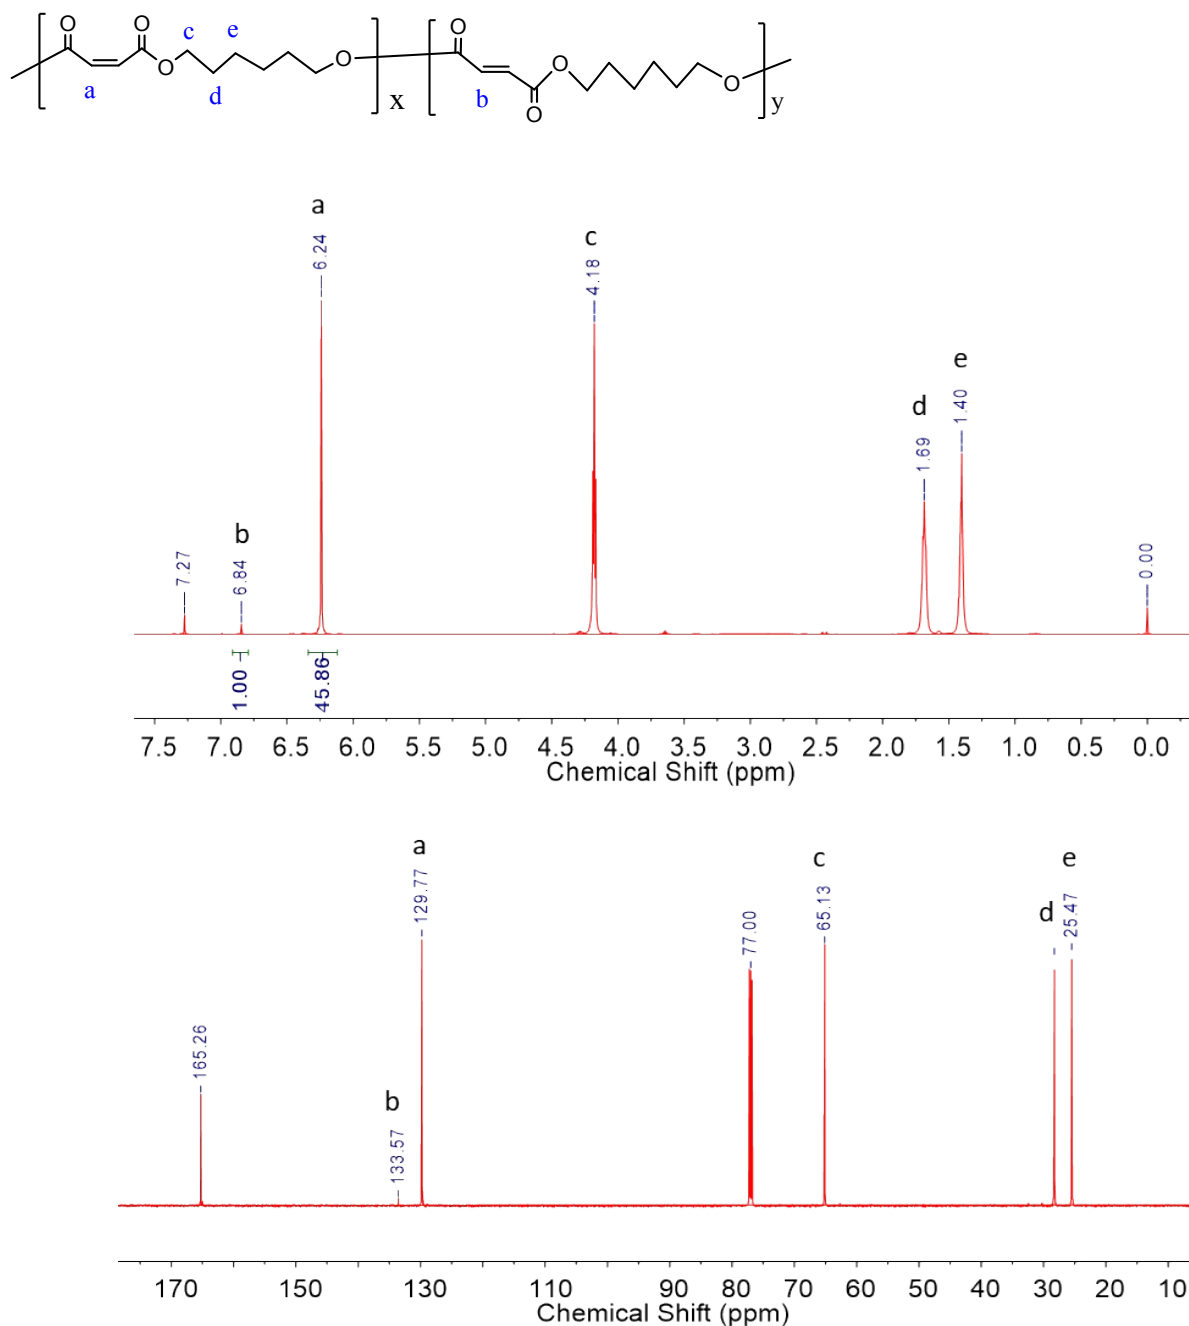

**Fig. S5 | Poly(hexylene maleate) (Table 1, entry 4), synthesized with MA/1,6-hexanediol of 1.05:1, in CDCl<sub>3</sub>. Top: <sup>1</sup>H NMR spectrum. Bottom: <sup>13</sup>C NMR spectrum. (M<sub>n</sub>=52 kDa, cis content=97.9%)**

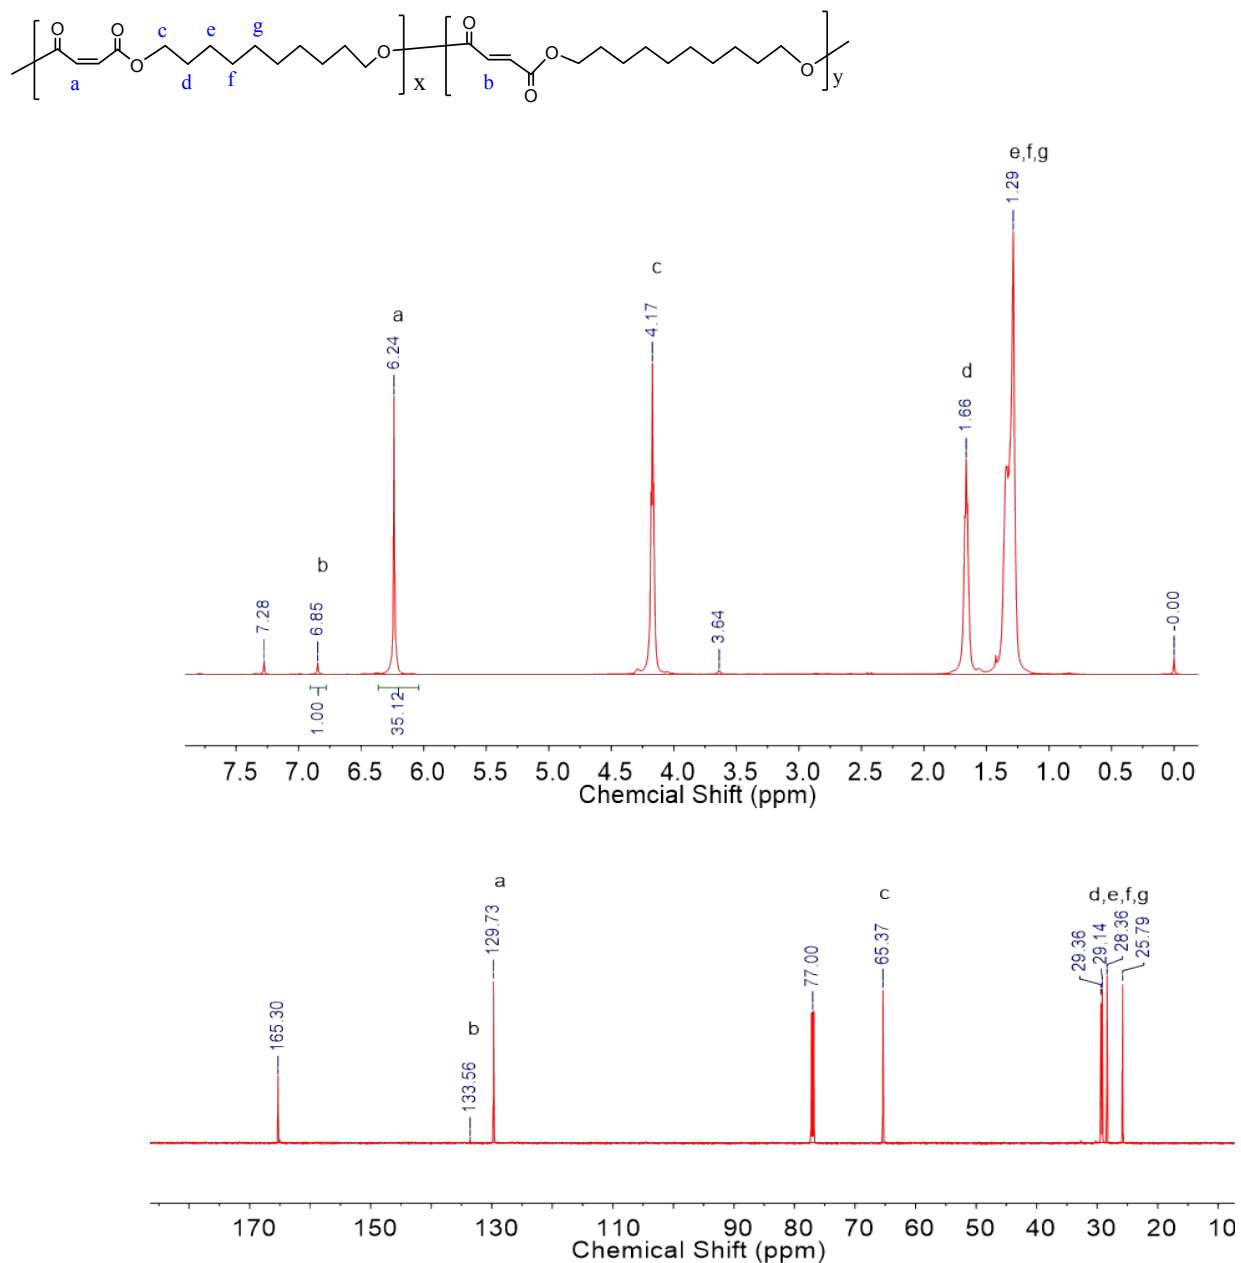

**Fig. S6 | Poly(decylene maleate) (Table 1, entry 5), synthesized with MA/1,10-decanediol of 1.05:1, in  $\text{CDCl}_3$ . Top:  $^1\text{H}$  NMR spectrum. Bottom:  $^{13}\text{C}$  NMR spectrum. ( $M_n=51$  kDa, cis content=97.2%)**



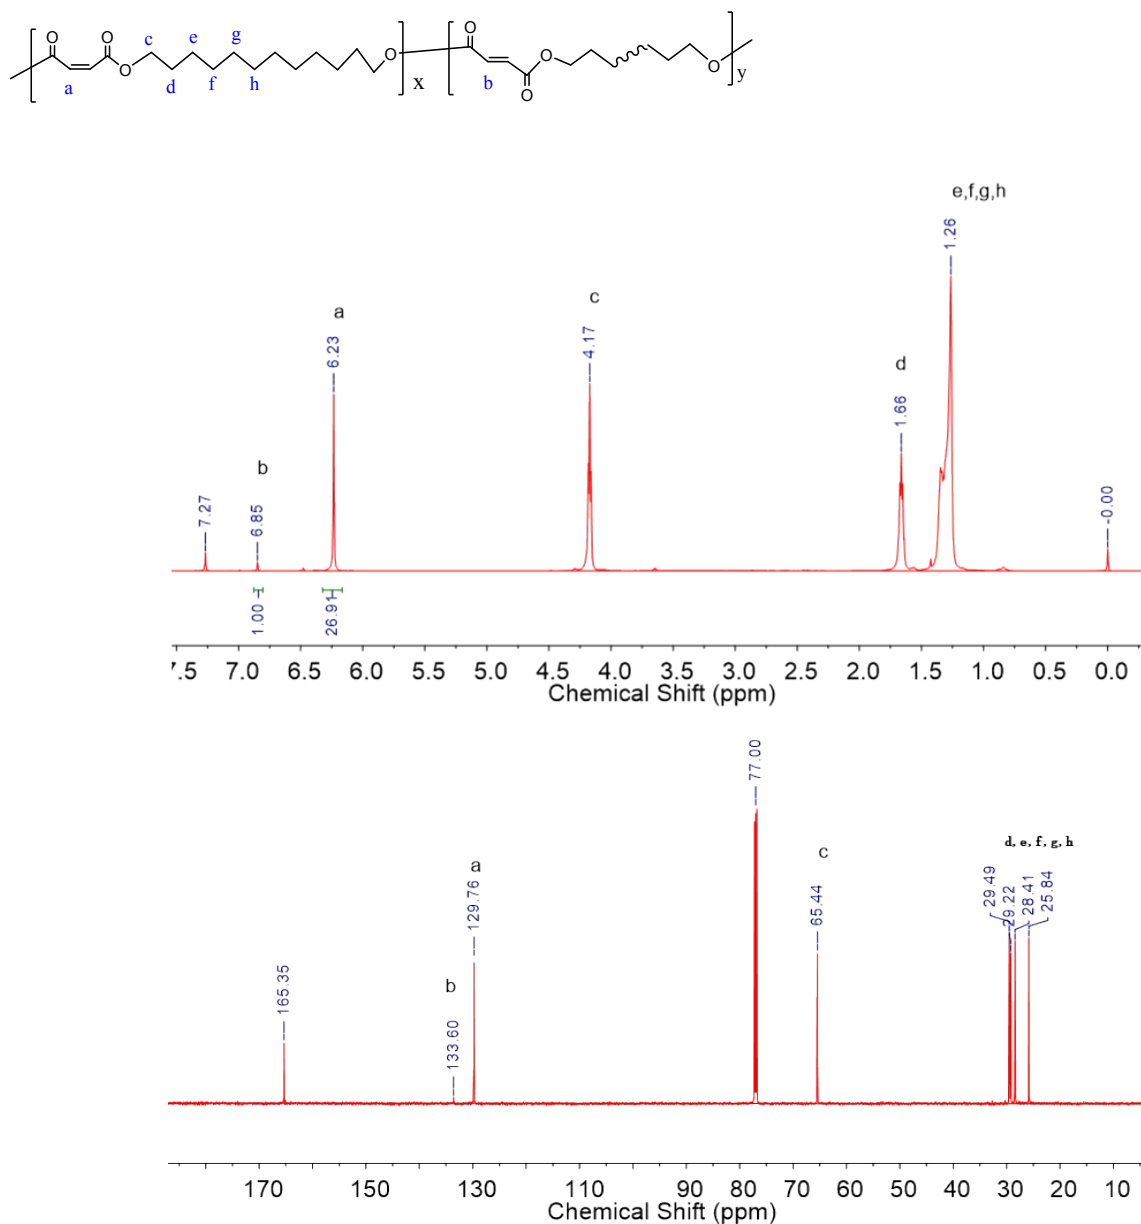

**Fig. S7 | Poly(dodecylene maleate) (Table 1, entry 6), synthesized with MA/1,12-dodecanediol of 1.05:1, in CDCl<sub>3</sub>. Top: <sup>1</sup>H NMR spectrum. Bottom: <sup>13</sup>C NMR spectrum. (M<sub>n</sub>=80 kDa, cis content=96.4%)**

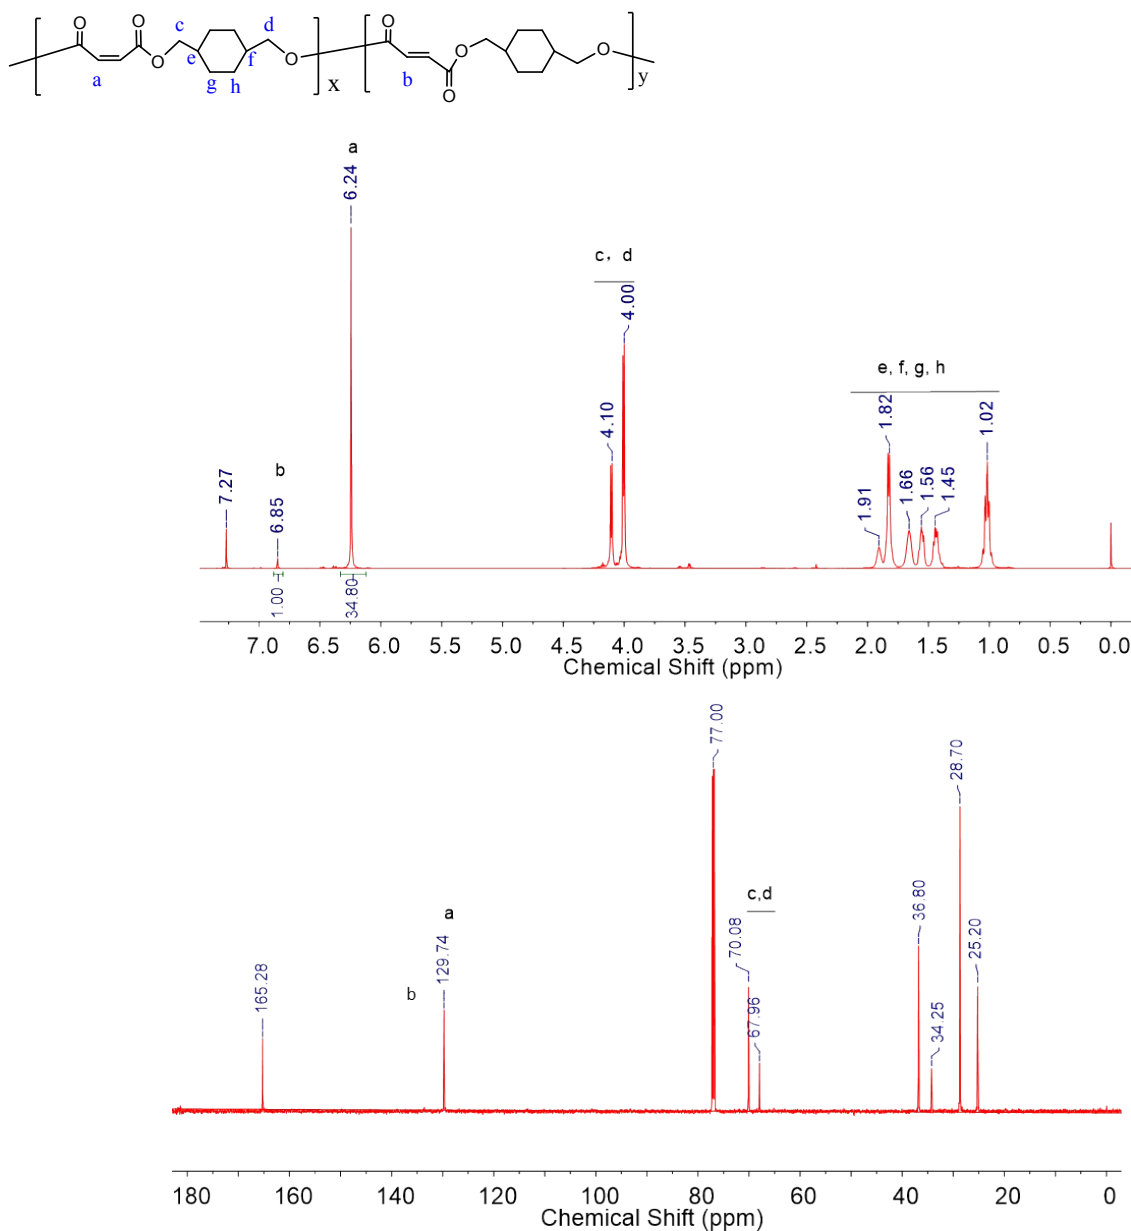

**Fig. S8 | Poly(1,4-cyclohexanedimethylene maleate) (Table 1, entry 7), synthesized with MA/1,4-cyclohexanedimethanol of 1.05:1, in CDCl<sub>3</sub>. Top: <sup>1</sup>H NMR spectrum. Bottom: <sup>13</sup>C NMR spectrum. (M<sub>n</sub>=44 kDa, cis content=97.2%)**

## Section S4. PBM synthesis with conventional transesterification catalysts and dehydration of MA

**Table S2 | Different catalysts applied for synthesis of PBM with excess MA**

| entry | MA:BDO <sup>a</sup> | catalyst                       | catalyst content (mol%) <sup>f</sup> | temp(°C) <sup>b</sup> | time(h) <sup>c</sup> | cis (%) <sup>d</sup> | M <sub>n</sub> (kDa) <sup>e</sup> |
|-------|---------------------|--------------------------------|--------------------------------------|-----------------------|----------------------|----------------------|-----------------------------------|
| 1     | 1.05:1              | ZnCl <sub>2</sub>              | 0.5                                  | 135                   | 6                    | 88.1                 | 1.9                               |
| 2     | 1.05:1              | SnCl <sub>2</sub>              | 0.5                                  | 135                   | 6                    | 74.6                 | 8.7                               |
| 3     | 1.05:1              | Sb <sub>2</sub> O <sub>3</sub> | 0.5                                  | 135                   | 6                    | 91.6                 | 1.5                               |
| 4     | 1.05:1              | GeO <sub>2</sub>               | 0.5                                  | 135                   | 6                    | 91.0                 | 1.3                               |
| 5     | 1.05:1              | Ti(OBu) <sub>4</sub>           | 0.5                                  | 135                   | 6                    | 91.4                 | 2.6                               |

<sup>a</sup>In molar ratio. <sup>b</sup>Polycondensation temperature. <sup>c</sup>Polycondensation time. <sup>d</sup>cis % was defined as cis/(cis+trans) and calculated from <sup>1</sup>H NMR. <sup>e</sup>M<sub>n</sub> was calculated from <sup>1</sup>H NMR. <sup>f</sup>Molar ratio of catalyst to BDO.

**Table S3 | Conversion of maleic acid to maleic anhydride**

| entry | Feeding              | temp(°C) <sup>a</sup> | time(h) <sup>b</sup> | Test description                                                   |
|-------|----------------------|-----------------------|----------------------|--------------------------------------------------------------------|
| 1     | maleic acid (0.2mol) | 140                   | 0.5                  | A large amount of maleic anhydride was collected in the cold trap. |

<sup>a</sup>Polycondensation temperature. <sup>b</sup>Polycondensation time.

## Section S5. Analysis of terminal groups by NMR during polyesterification with excess MA

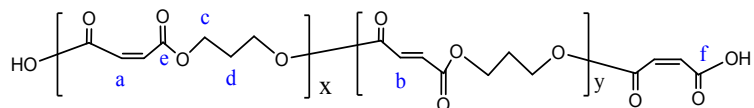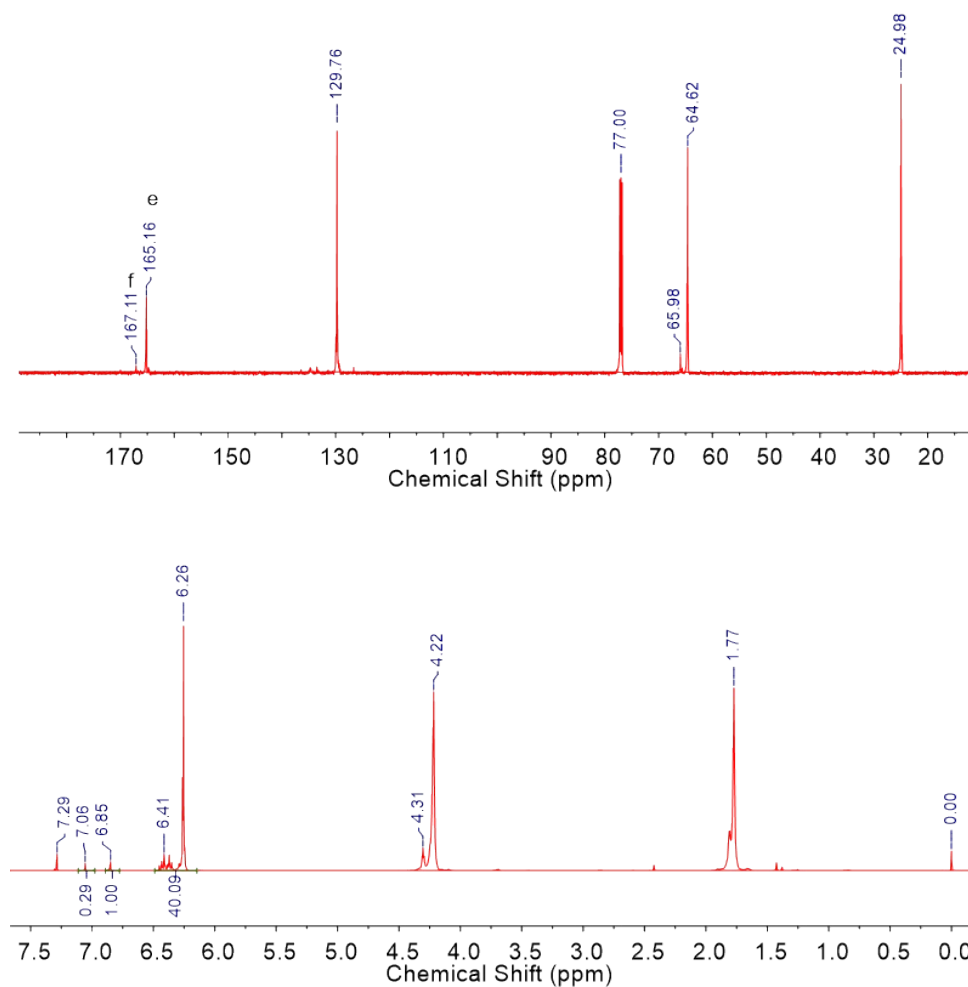

**Fig.S9 | NMR analysis of the reaction mixture after 1 h at 110 °C (TsOH: 1 mol%, MA/BDO= 1.05:1). Top: <sup>13</sup>C NMR spectrum. Bottom: <sup>1</sup>H NMR spectrum in CDCl<sub>3</sub>.**

## Section S6. Characterization of poly(butylene itaconate) by NMR

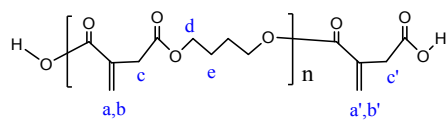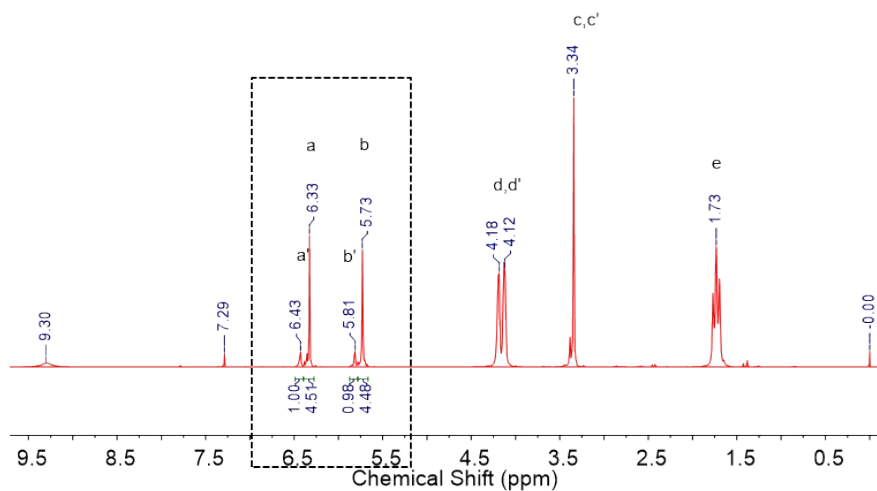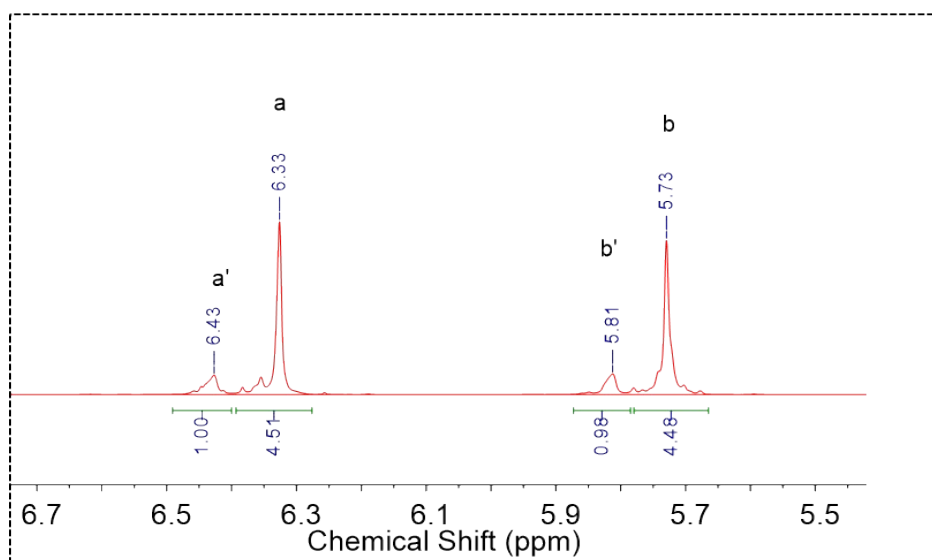

**Fig. S10** | <sup>1</sup>H NMR spectrum of poly(butylene itaconate), synthesized under typical conditions (itaconic acid /BDO =1.05:1, 135 °C, 1 mol% TsOH, 8 h), in CDCl<sub>3</sub>. (M<sub>n</sub>=960)

## Section S7. NMR spectra of MA-based polyesters prepared with equimolar MA and diols

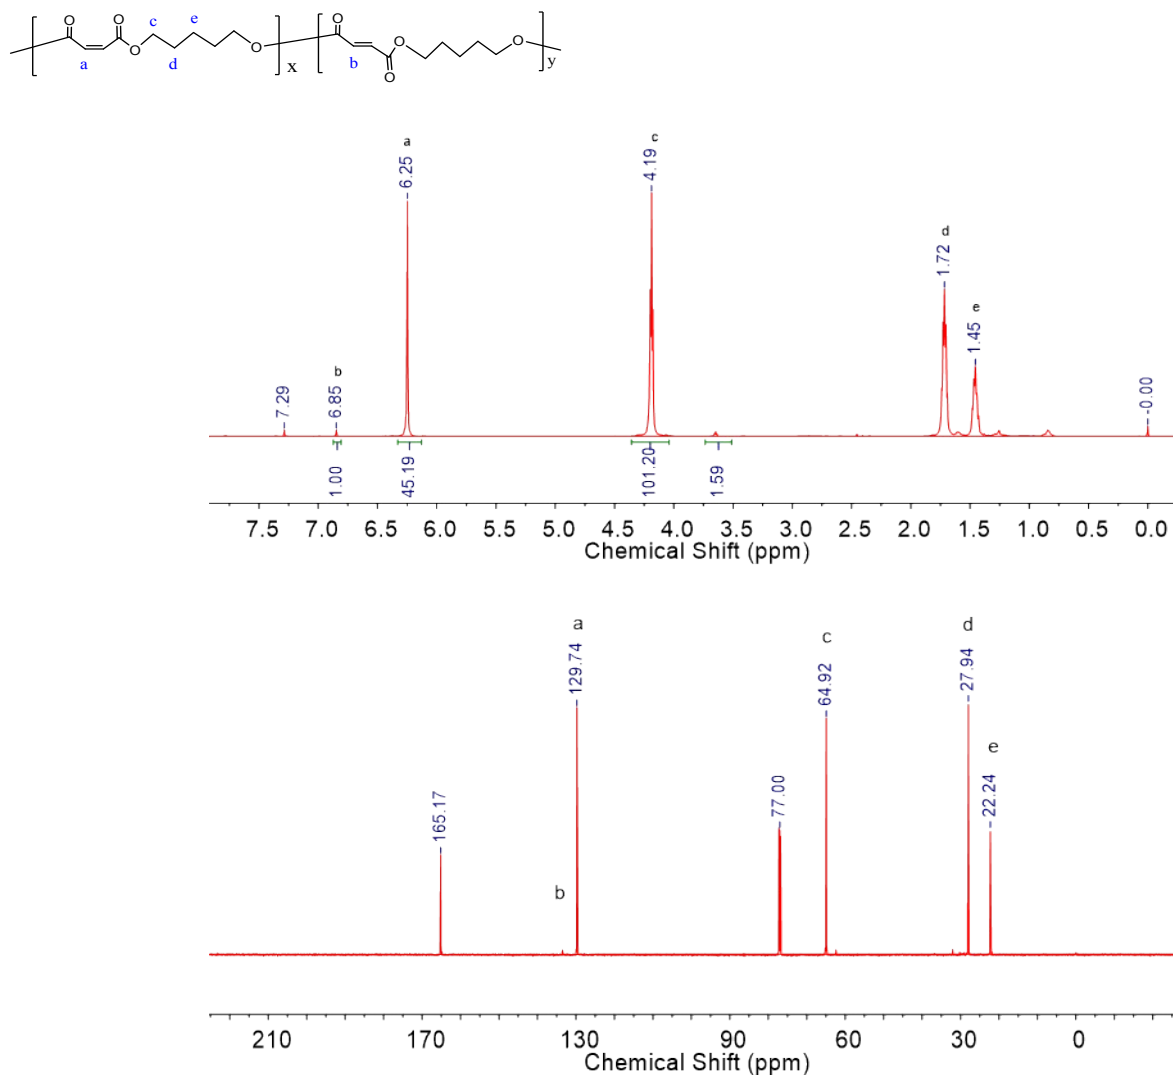

**Fig. S11 | Poly(pentylene maleate) (Table 1, entry 9) in CDCl<sub>3</sub>.** Top: <sup>1</sup>H NMR spectrum. Bottom: <sup>13</sup>C NMR spectrum. (M<sub>n</sub>=11.8 kDa, cis content=97.8%)

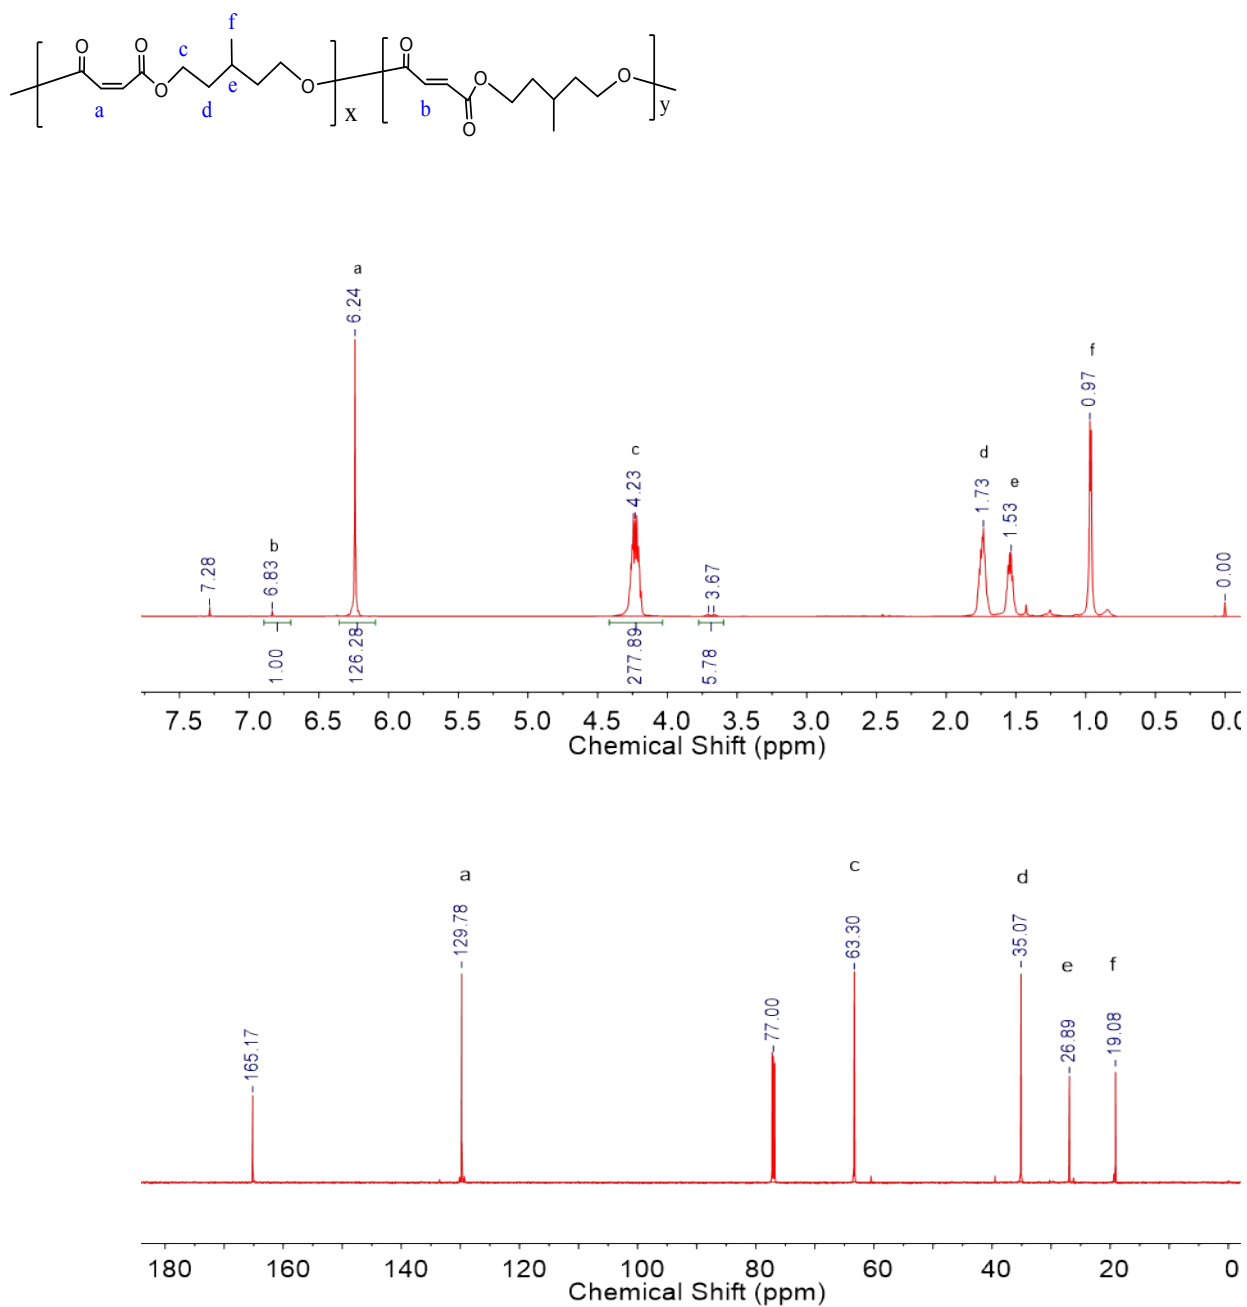

**Fig. S12 | Poly(3-methylpentylene maleate) (Table 1, entry 10) in CDCl<sub>3</sub>.** Top: <sup>1</sup>H NMR spectrum. Bottom: <sup>13</sup>C NMR spectrum. (M<sub>n</sub>=9.6 kDa, cis content=99.2%)

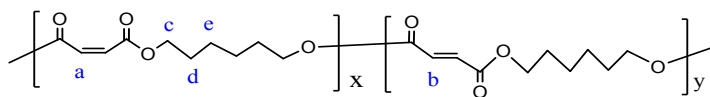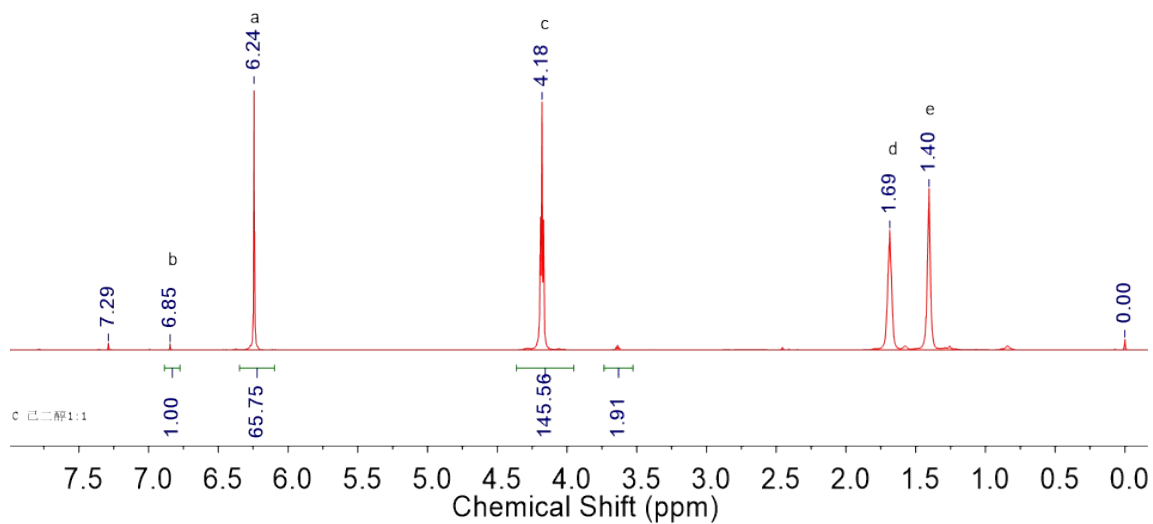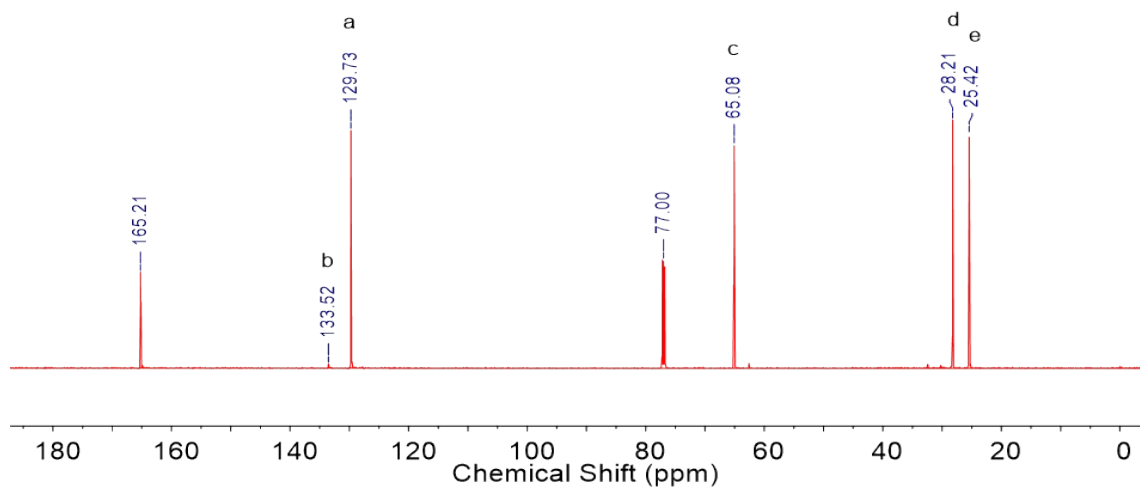

**Fig. S13 | Poly(hexylene maleate) (Table 1, entry 11) in  $\text{CDCl}_3$ . Top:  $^1\text{H}$  NMR spectrum. Bottom:  $^{13}\text{C}$  NMR spectrum. ( $M_n=15.2$  kDa, cis content=98.5%)**



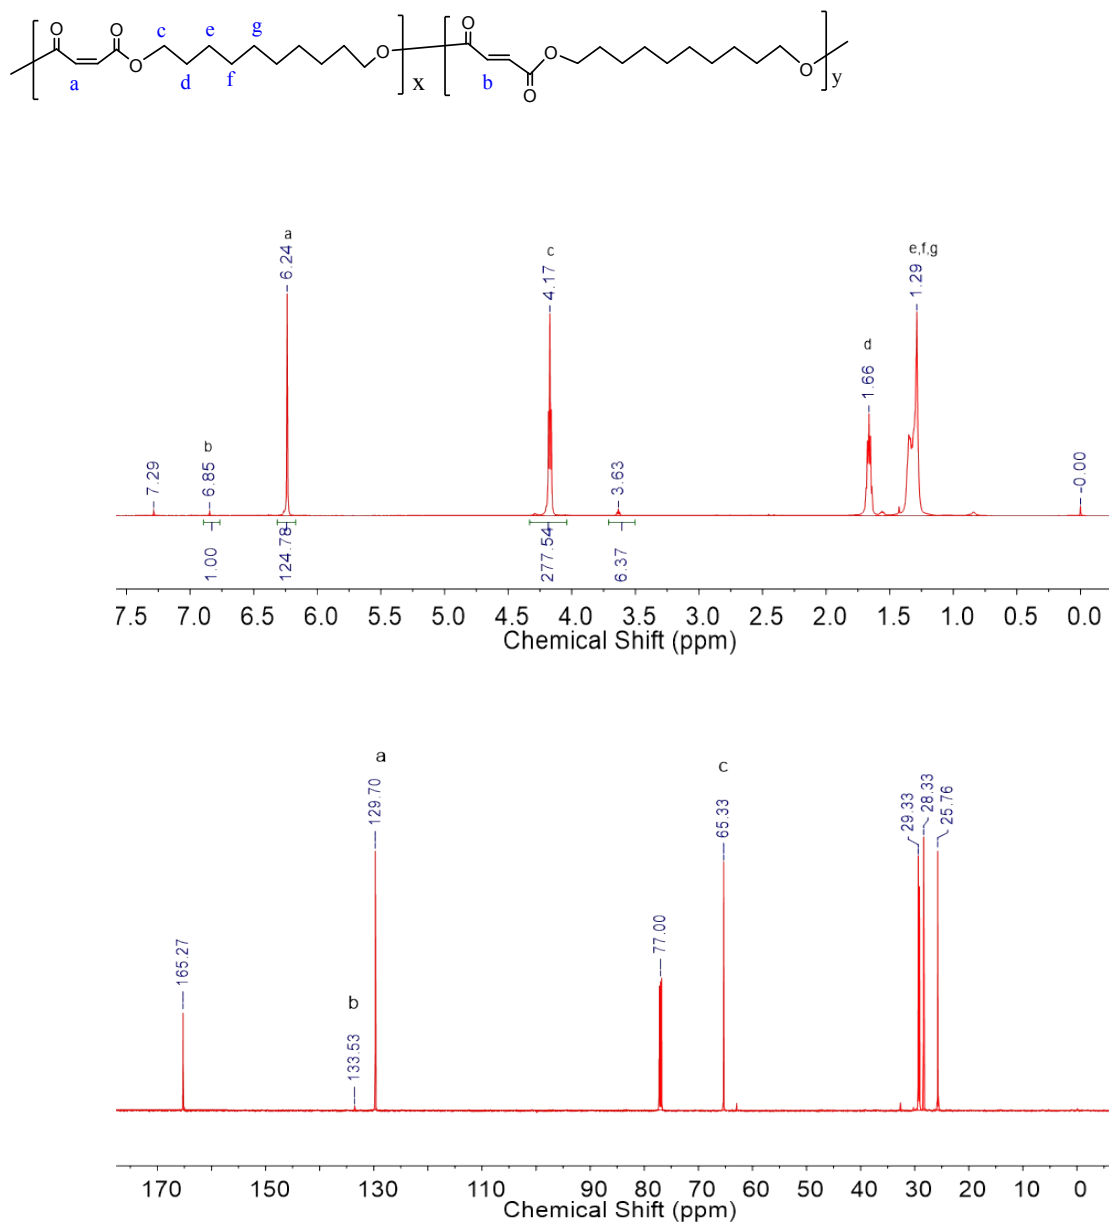

**Fig. S14 | Poly(decylene maleate) (Table 1, entry 12) in CDCl<sub>3</sub>. Top: <sup>1</sup>H NMR spectrum. Bottom: <sup>13</sup>C NMR spectrum. (M<sub>n</sub>=11.2 kDa, cis content=99.2%)**

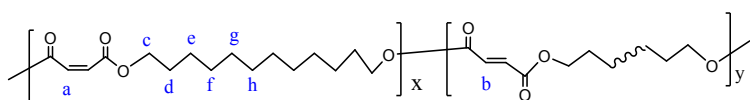

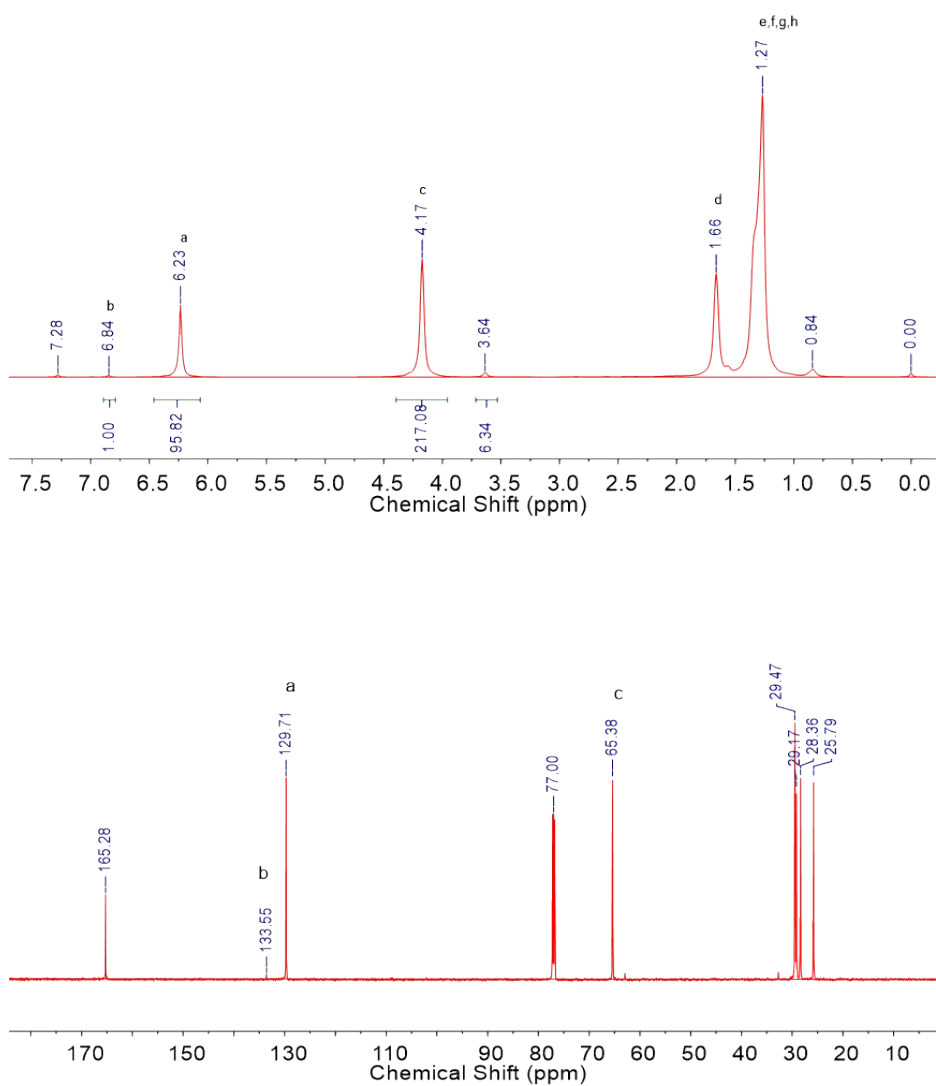

**Fig. S15 | Poly(dodecylene maleate) (Table 1, entry 13) in CDCl<sub>3</sub>.** Top: <sup>1</sup>H NMR spectrum. Bottom: <sup>13</sup>C NMR spectrum. ( $M_n=9.9$  kDa, cis content=98.9%)

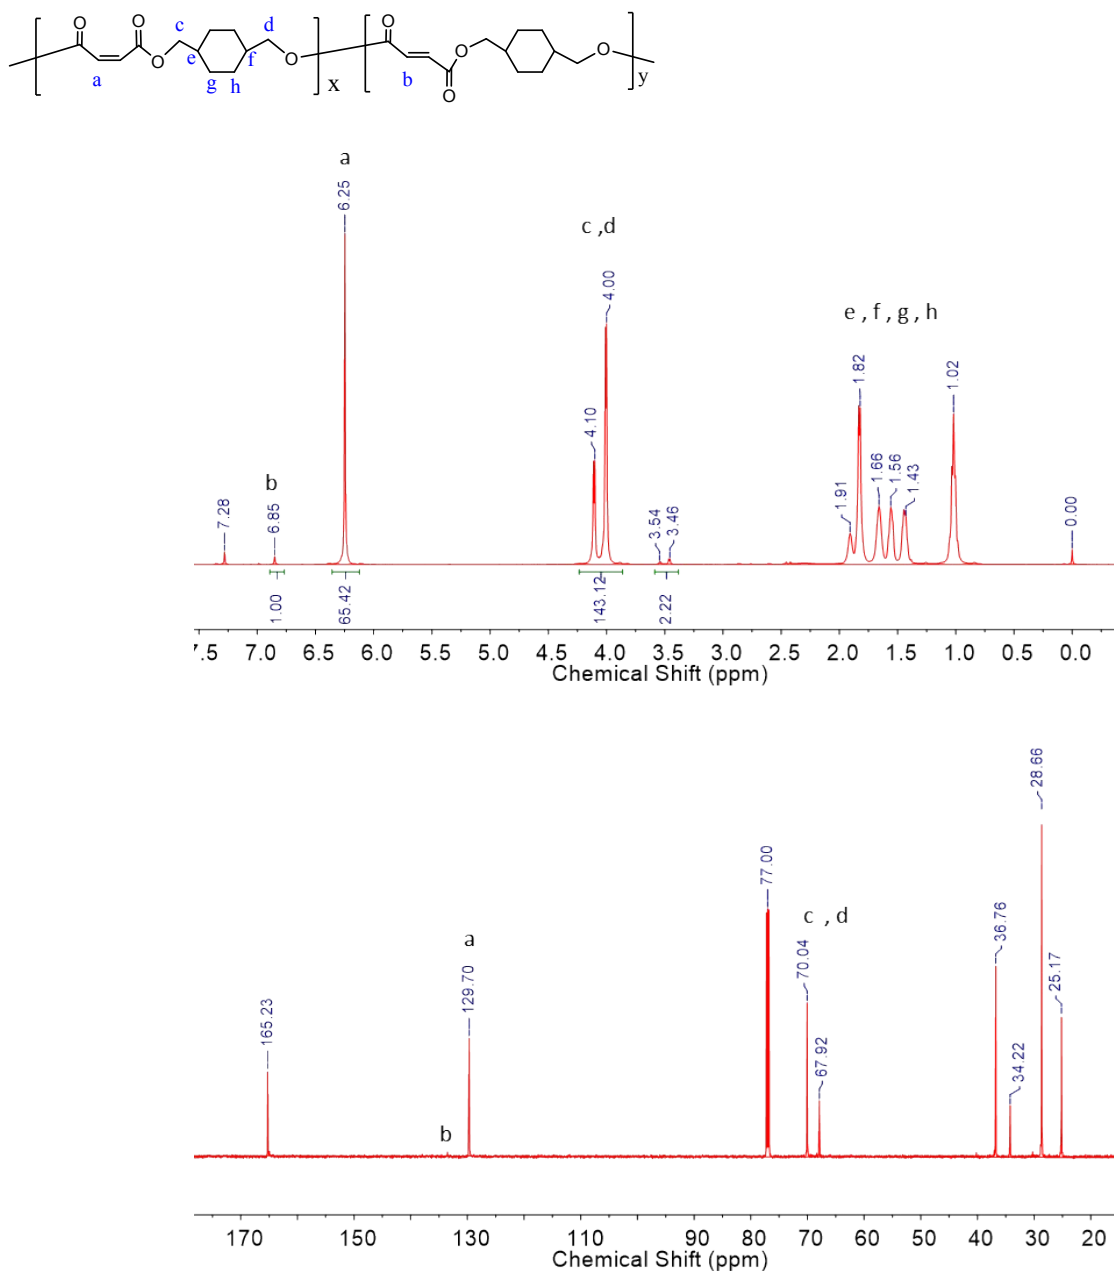

**Fig. S16 | Poly(1,4-cyclohexanedimethylene maleate) (Table 1, entry 14) in  $\text{CDCl}_3$ . Top:  $^1\text{H}$  NMR spectrum. Bottom:  $^{13}\text{C}$  NMR spectrum. ( $M_n=12.9$  kDa, cis content=98.4%)**

## Section S8. NMR Spectra of MA-based polyesters prepared with excess diols

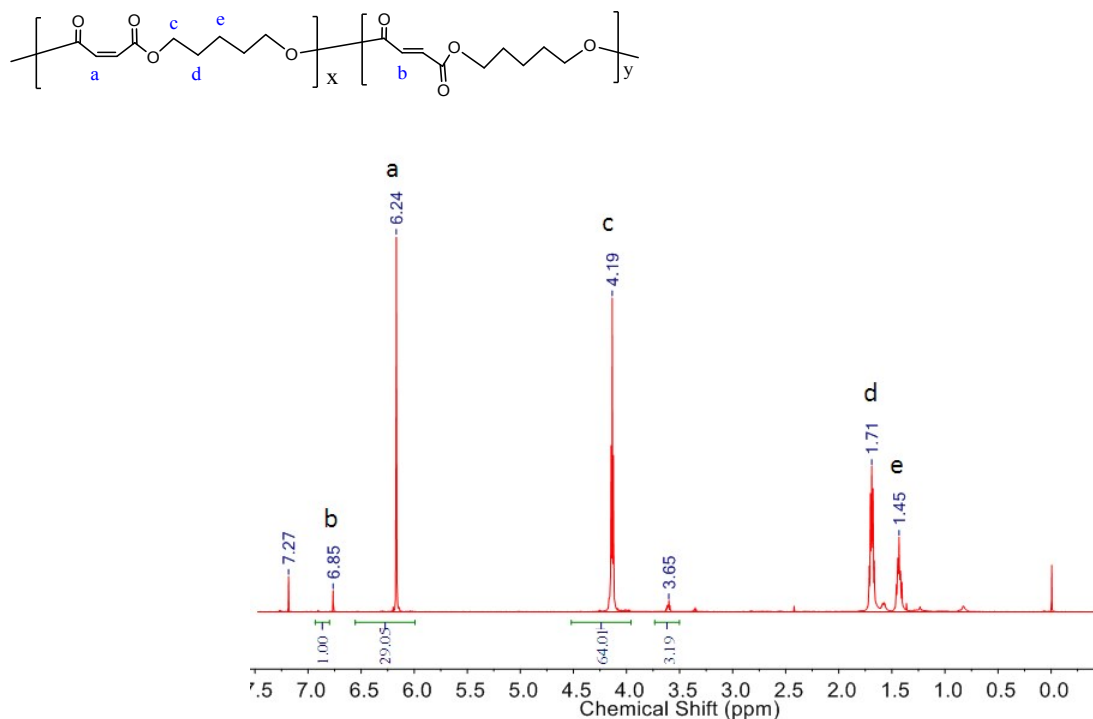

**Fig. S17** | <sup>1</sup>H NMR spectrum of poly(pentylene maleate) (Table 1, entry 16) in CDCl<sub>3</sub>. (Mn=3.8 kDa, cis content=96.7%)

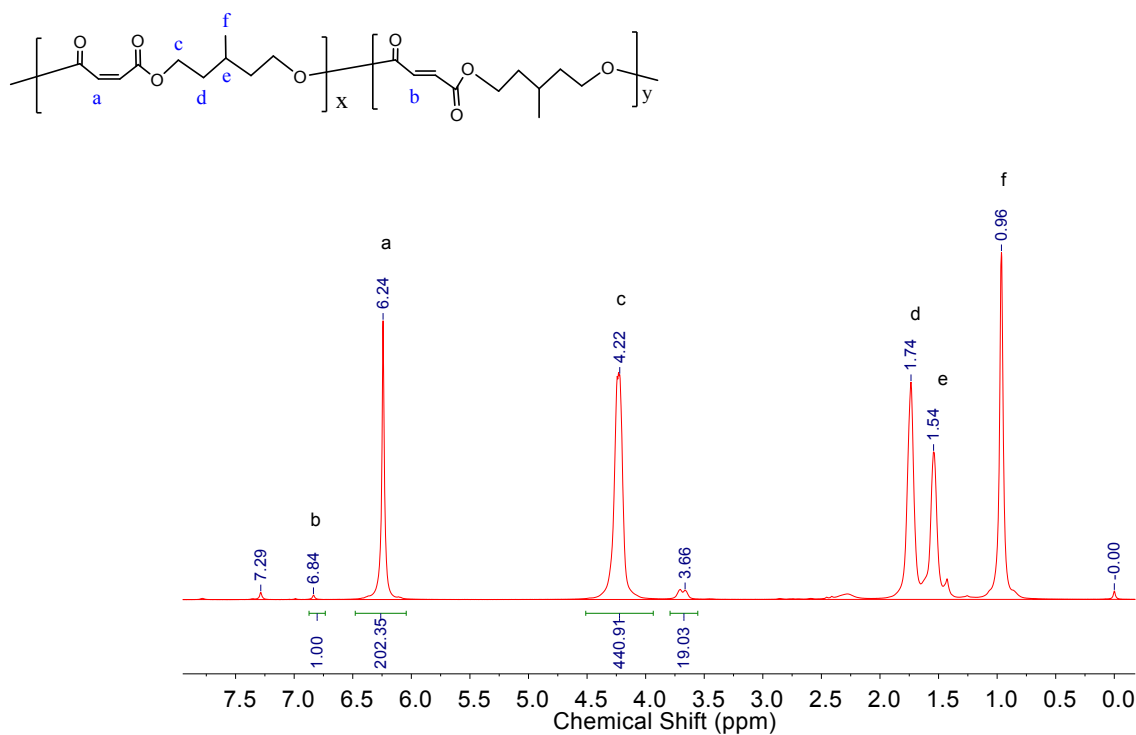

**Fig. S18** | <sup>1</sup>H NMR spectrum of poly(3-methylpentylene maleate) (Table 1, entry 17) in CDCl<sub>3</sub>. (Mn= 4.7 kDa, cis content=99.5%)

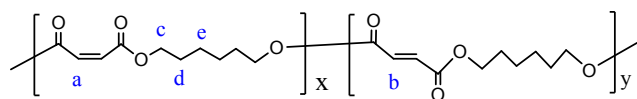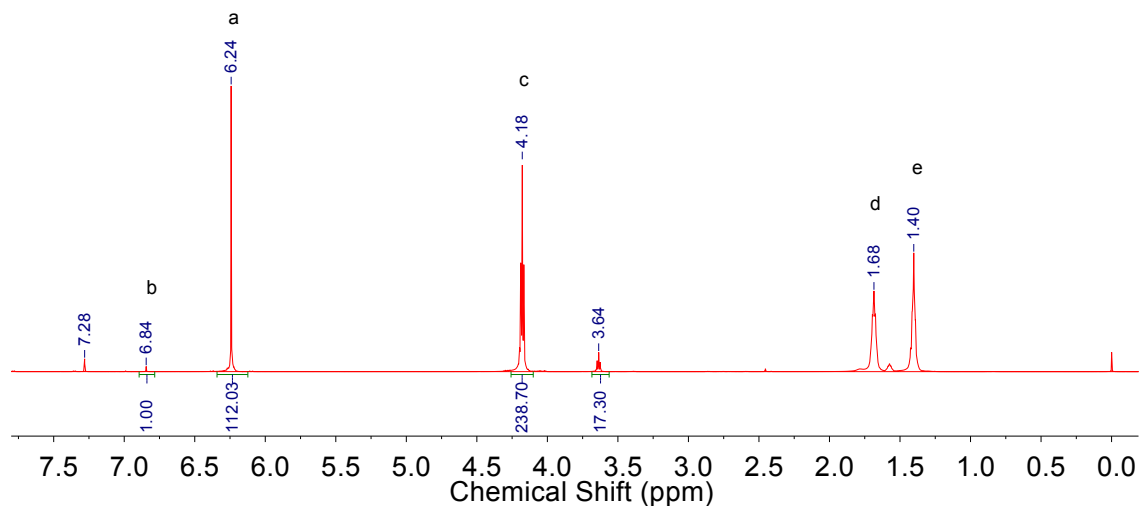

**Fig. S19** |  $^1\text{H}$  NMR spectrum of poly(hexylene maleate) (Table 1, entry 18) in  $\text{CDCl}_3$ . ( $M_n=2.8$  kDa, cis content=99.1%)

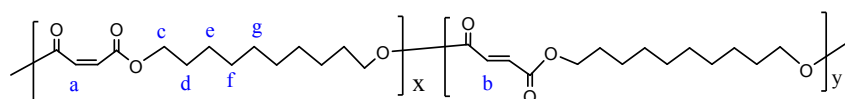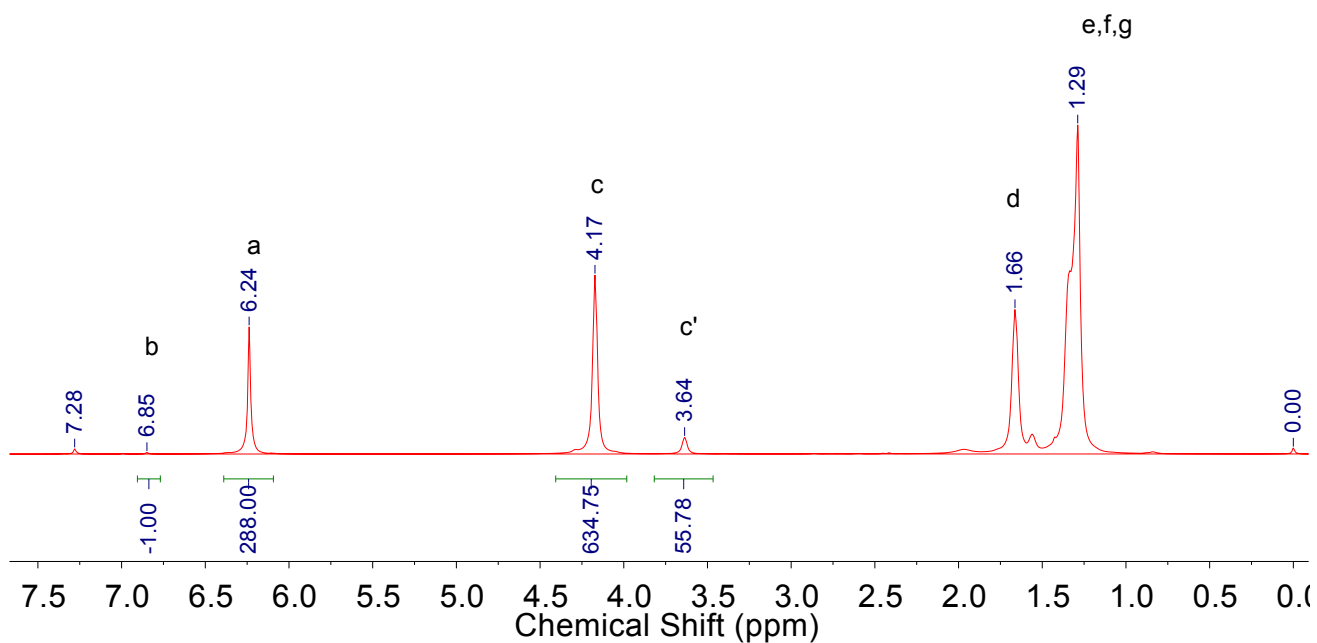

**Fig. S20** |  $^1\text{H}$  NMR spectrum of poly(decylene maleate) (Table 1, entry 19) in  $\text{CDCl}_3$ . ( $M_n=3.1$  kDa, cis content=99.7%)

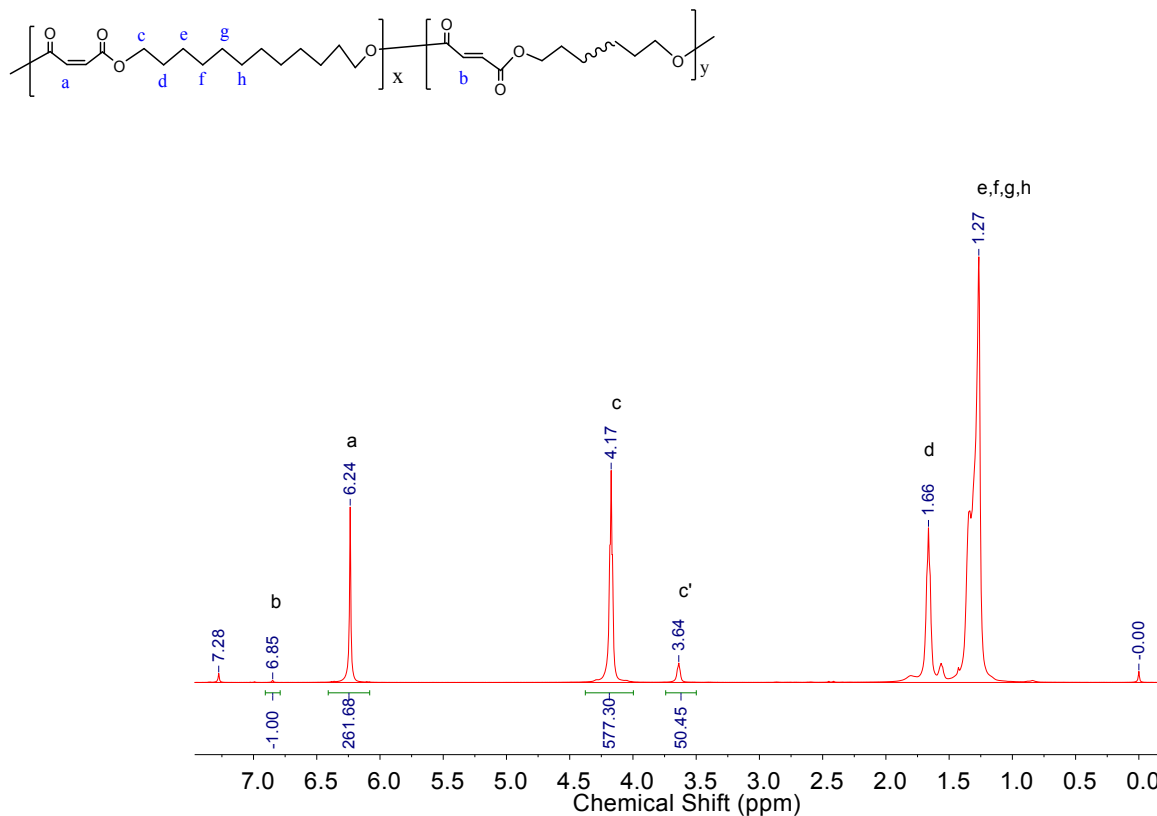

**Fig. S21** | <sup>1</sup>H NMR spectrum of poly(dodecylene maleate) (Table 1, entry 20) in CDCl<sub>3</sub>. ( $M_n=3.4$  kDa, cis content=99.6%)

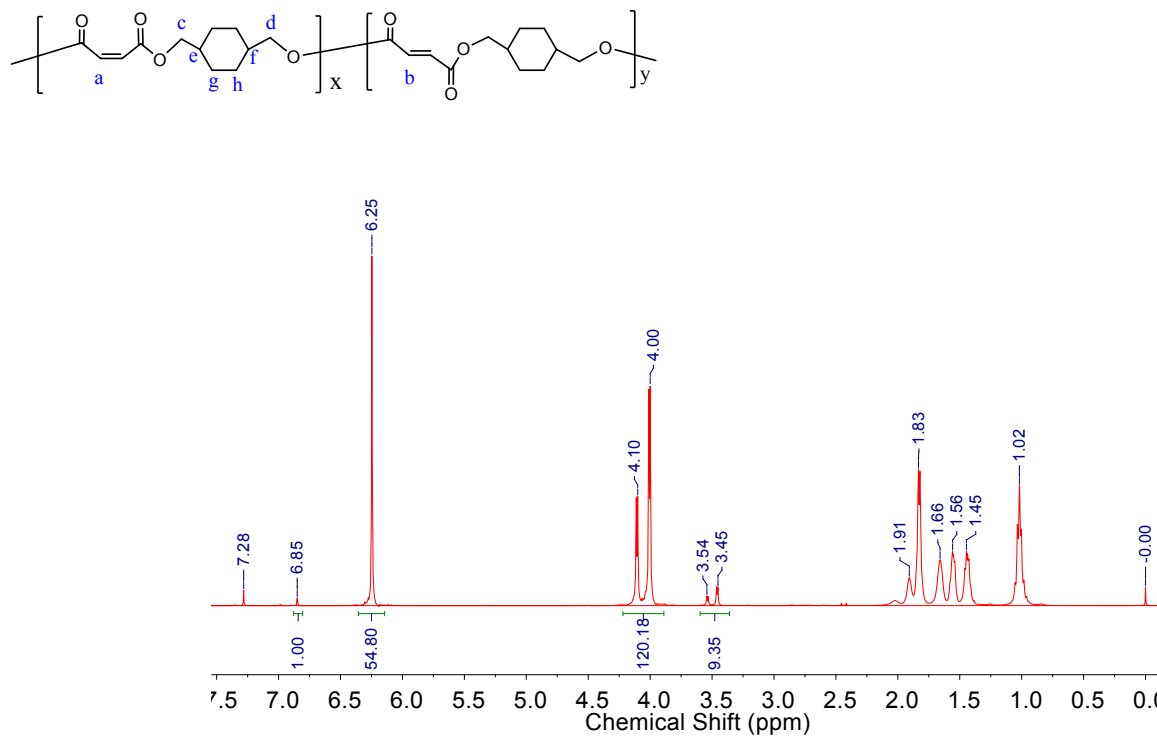

**Fig. S22** | <sup>1</sup>H NMR spectrum of poly(1,4-cyclohexanedimethylene maleate) (Table 1, entry 21) in CDCl<sub>3</sub>. ( $M_n=2.7$  kDa, cis content=98.2%)

## Section S9. PBM synthesis with conventional transesterification catalysts with excess BDO and PBM synthesis using Dimethyl maleate and BDO

**Table S4 | Different catalysts applied for the synthesis of PBM with excess BDO**

| entry | MA:<br>BDO <sup>a</sup> | catalyst                       | catalyst content<br>(mol%) <sup>f</sup> | temp(°C) <sup>b</sup> | time(h) <sup>c</sup> | cis (%) <sup>d</sup> | M <sub>n</sub> (kDa) <sup>e</sup> | ref          |
|-------|-------------------------|--------------------------------|-----------------------------------------|-----------------------|----------------------|----------------------|-----------------------------------|--------------|
| 1     | 1:1.1                   | ZnCl <sub>2</sub>              | 0.5                                     | 160                   | 6                    | 77.1                 | 7 <sup>d</sup>                    | this work    |
| 2     | 1:1.1                   | SnCl <sub>2</sub>              | 0.5                                     | 160                   | 6                    | 72.5                 | 10.3 <sup>d</sup>                 | this work    |
| 3     | 1:1.1                   | Sb <sub>2</sub> O <sub>3</sub> | 0.5                                     | 160                   | 6                    | 78.9                 | 2.2 <sup>d</sup>                  | this work    |
| 4     | 1:1.1                   | GeO <sub>2</sub>               | 0.5                                     | 160                   | 6                    | 88.6                 | 1.2 <sup>d</sup>                  | this work    |
| 5     | 1:1                     | Ti(OBu) <sub>4</sub>           | 0.6                                     | 160                   | -                    | 88.9                 | 4.2                               | <sup>1</sup> |

<sup>a</sup> In molar ratio. <sup>b</sup> Polycondensation temperature. <sup>c</sup> Polycondensation time. <sup>d</sup> cis % was defined as cis/(cis+trans) and calculated from <sup>1</sup>H NMR. <sup>e</sup> Mn was calculated from <sup>1</sup>H NMR. <sup>f</sup> Molar ratio of catalyst to MA.

**Table S5 | Synthesis of PBM using dimethyl maleate and BDO**

| entry | Feeding                                      | catalyst | catalyst content<br>(mol%) <sup>d</sup> | temp(°C) <sup>b</sup> | time(h) <sup>c</sup> | Test description                                                       |
|-------|----------------------------------------------|----------|-----------------------------------------|-----------------------|----------------------|------------------------------------------------------------------------|
| 1     | dimethyl maleate :<br>BDO=1:1.1 <sup>a</sup> | TsOH     | 1                                       | 140                   | 8                    | In the esterification stage, no liquid was collected in the water trap |

<sup>a</sup> In molar ratio. <sup>b</sup> Esterification temperature. <sup>c</sup> Esterification time. <sup>d</sup> Molar ratio of catalyst to dimethyl maleate.

## Section S10. Analysis of byproduct in the cold trap by NMR

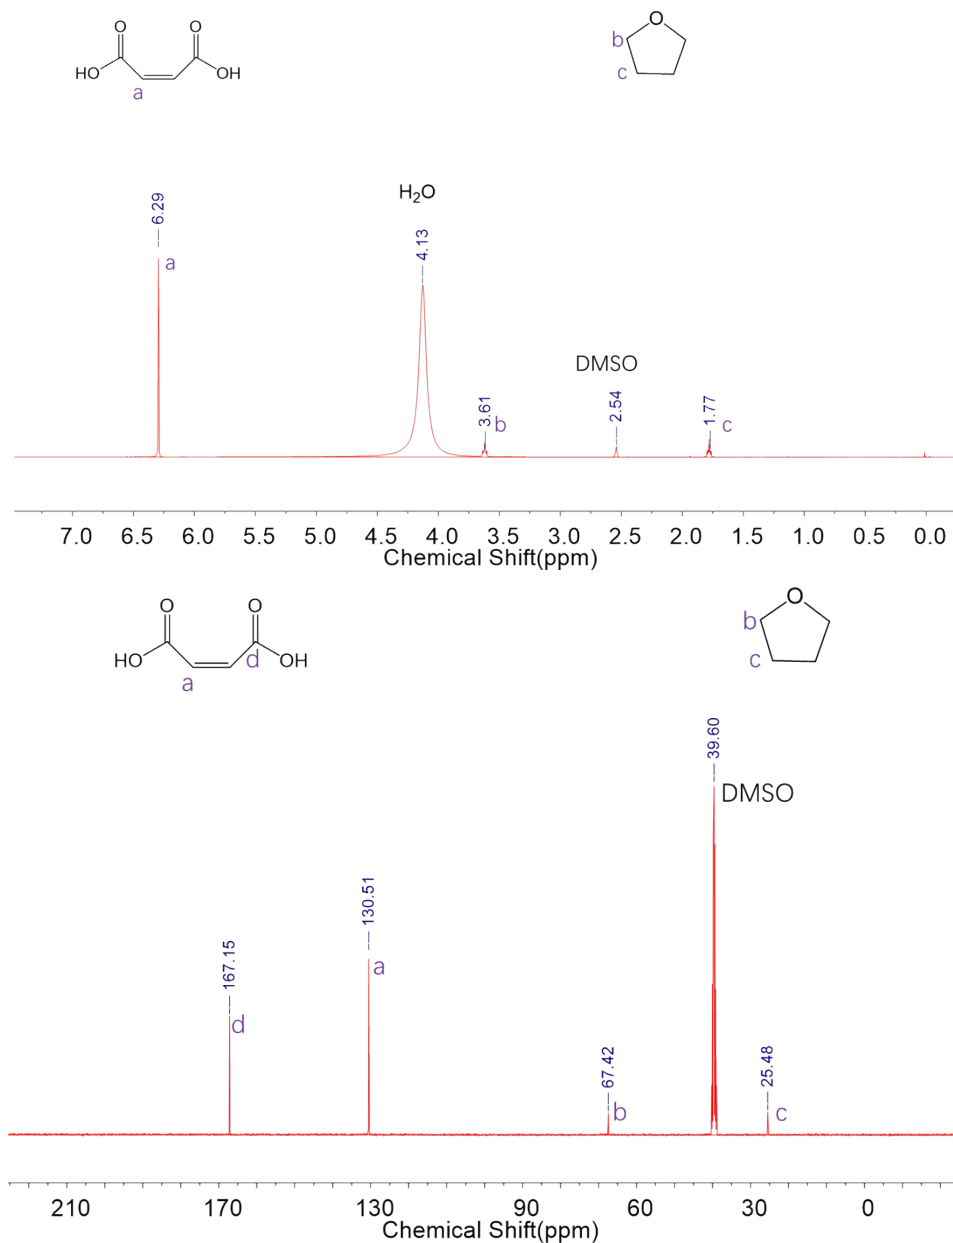

**Fig.S23 | NMR analysis of liquid byproducts mixture in the cold trap (MA/BDO= 1:1.1). Top:  $^{13}\text{C}$  NMR spectrum. Bottom:  $^1\text{H}$  NMR spectrum in DMSO.**



## Section S11. Analysis of terminal groups by NMR during polyesterification with excess diol

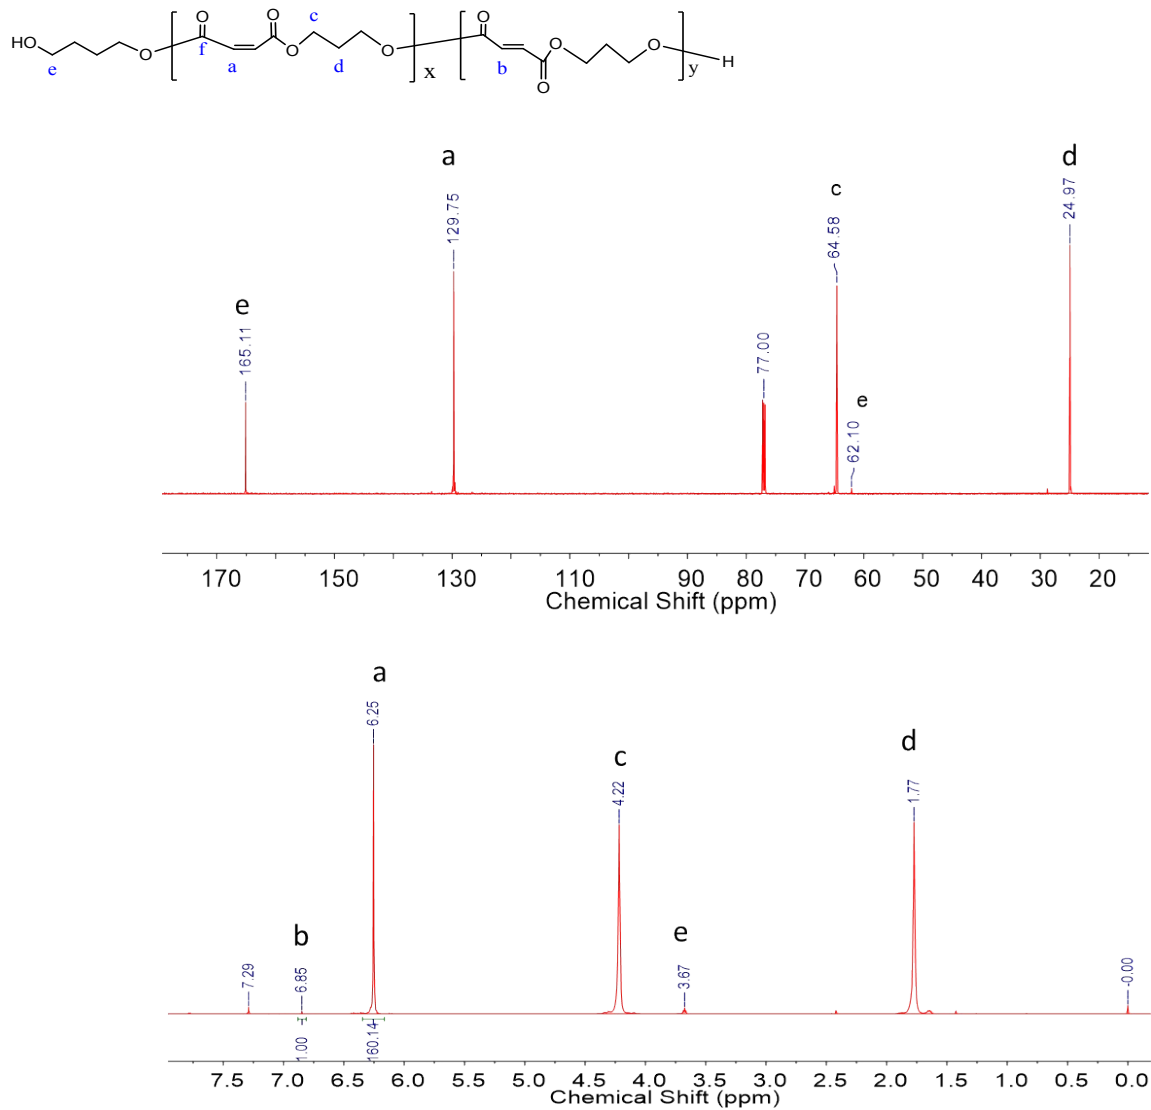

Fig.S24 | NMR analysis of the reaction mixture after 1 h at 120 °C (TsOH: 1 mol%, MA/BDO= 1:1.2). Top:  $^{13}\text{C}$  NMR spectrum. Bottom:  $^1\text{H}$  NMR spectrum in  $\text{CDCl}_3$ .

## Section S12. Characterizations of the cyclic byproducts obtained with excess

### BDO

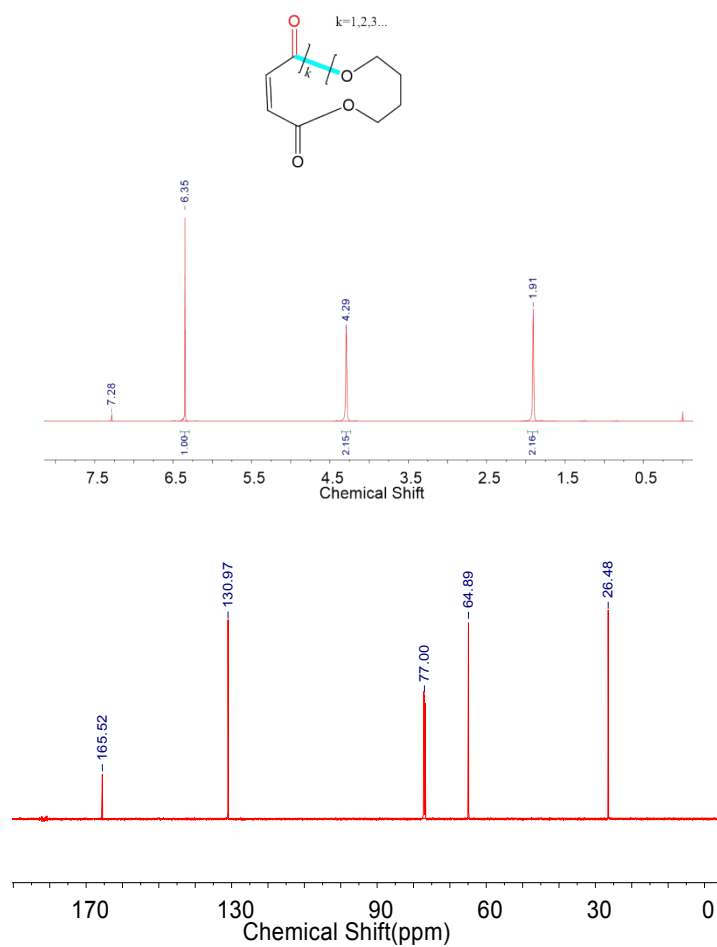

**Fig. S25 | Cyclic poly(butylene maleate) byproduct in  $\text{CDCl}_3$ .** Top:  $^1\text{H}$  NMR spectrum. Bottom:  $^{13}\text{C}$  NMR spectrum.

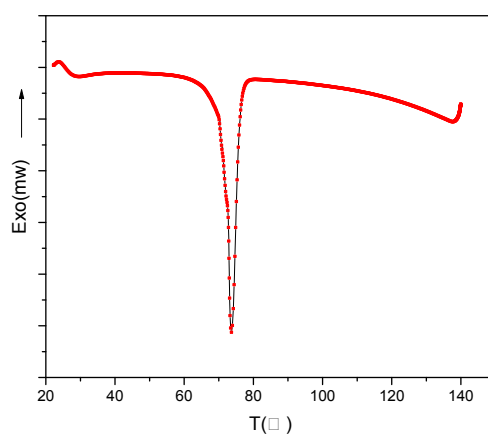

**Fig. S26 | DSC curve of the cyclic byproduct.**  $T_m$  is 73.6 °C.

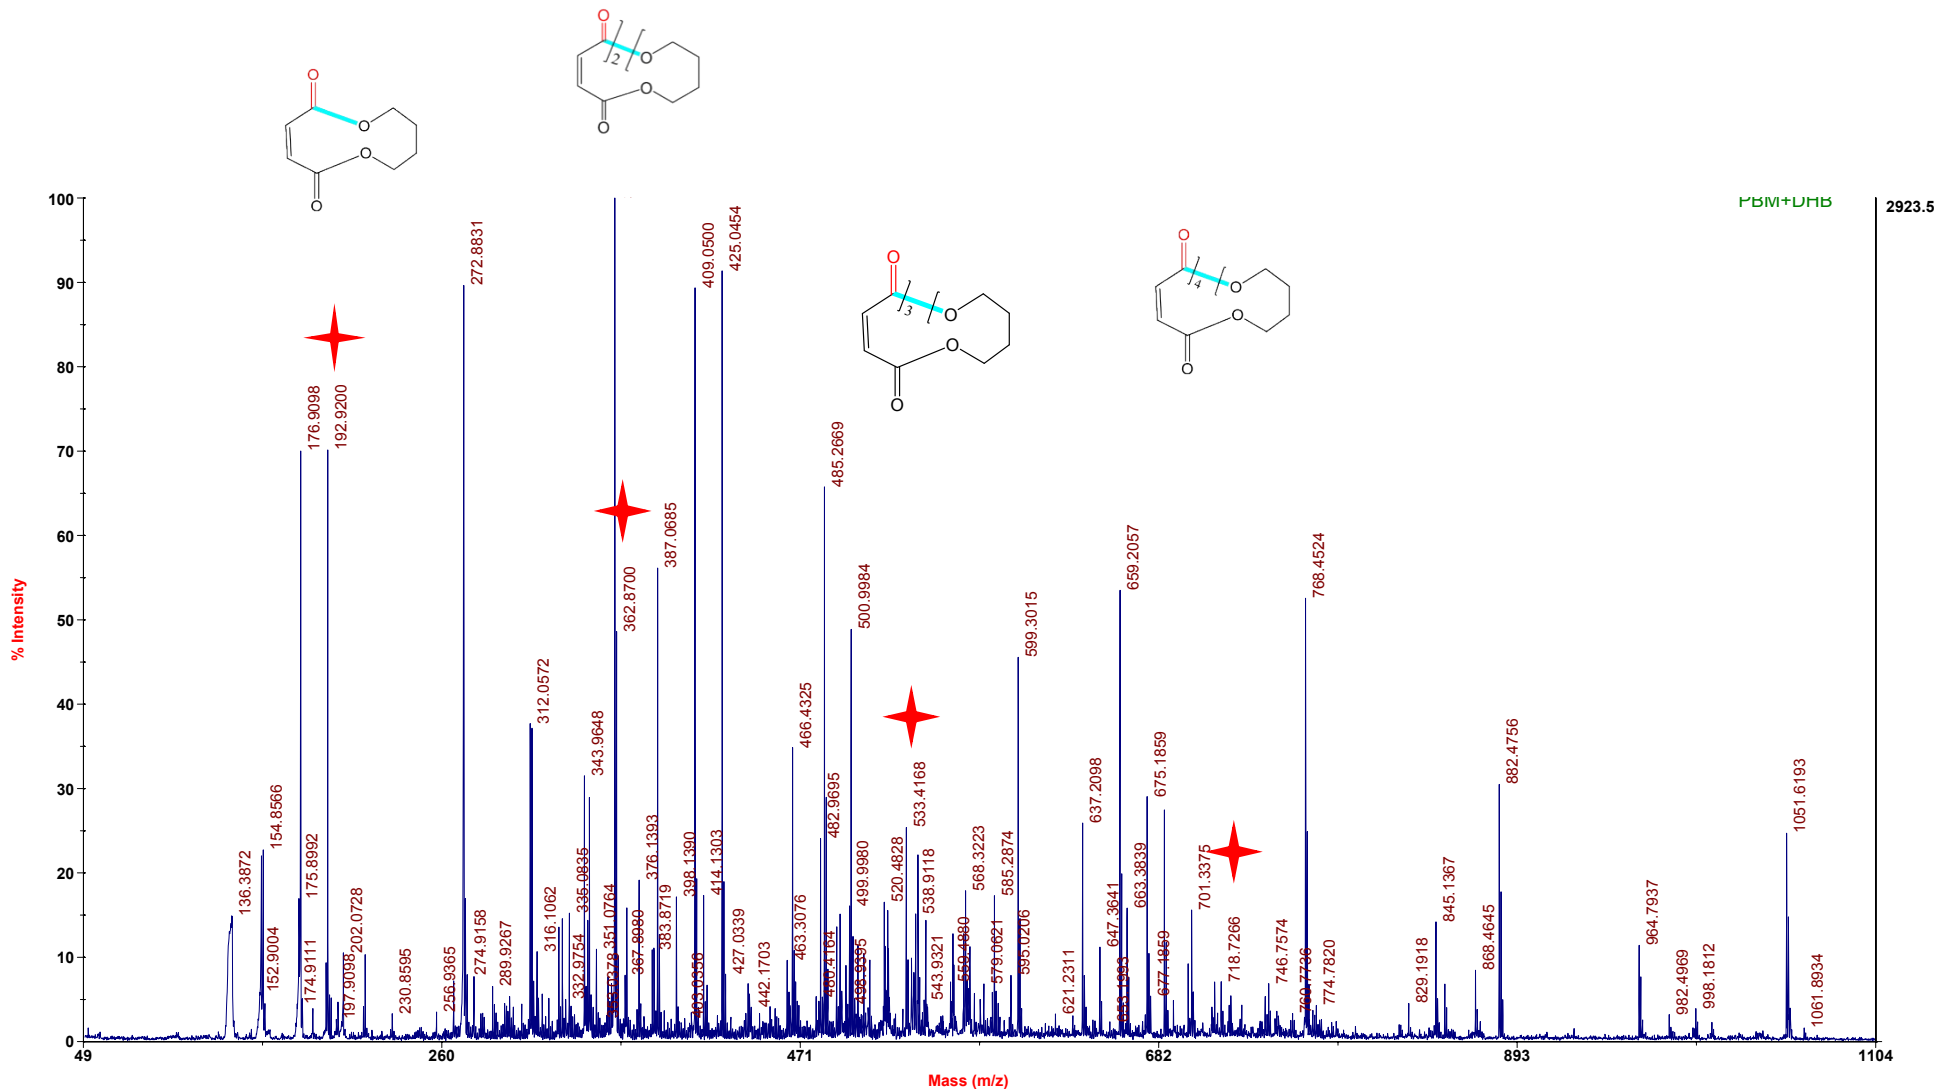

Fig. S27 | MALDI-TOF MS of the cyclic byproduct

1. Yu, Y.; Wei, Z.; Leng, X.; Li, Y. J. P. C., Facile preparation of stereochemistry-controllable biobased poly (butylene maleate-co-butylene fumarate) unsaturated copolyesters: a chemoselective polymer platform for versatile functionalization via aza-Michael addition. **2018**, *9* (45), 5426-5441.
